# Supplementary material for: Intensive aquaculture affects lake's trophic status and aquatic floral diversity
Source: Royal Society of Chemistry journal article supplement (doi:10.1039/d4va00038b), 2024-01-01
Supplement: d4va00038b1.pdf [file d4va00038b1.pdf]

|                                                                                                                                                         |                                                                                                        |                                                                                                        |
|---------------------------------------------------------------------------------------------------------------------------------------------------------|--------------------------------------------------------------------------------------------------------|--------------------------------------------------------------------------------------------------------|
|  <p>Monsoon-2018</p>                                                   |  <p>Winter- 2019</p> |  <p>Summer-2019</p> |
| <p>Images depicting the effect of aquaculture activity and fragmentation on the macrophytic diversity of the lake during the first year of sampling</p> |                                                                                                        |                                                                                                        |
|                                                                      |                    |                                                                                                        |
| <p>Fragmentation of the lakes for the purpose of chestnut cultivation (left) and for fish rearing (Right)[<b>Monsoon</b>]</p>                           | <p>Chestnut (<i>Trapa natans</i>) cultivation in the lake [<b>Monsoon</b>]</p>                         |                                                                                                        |

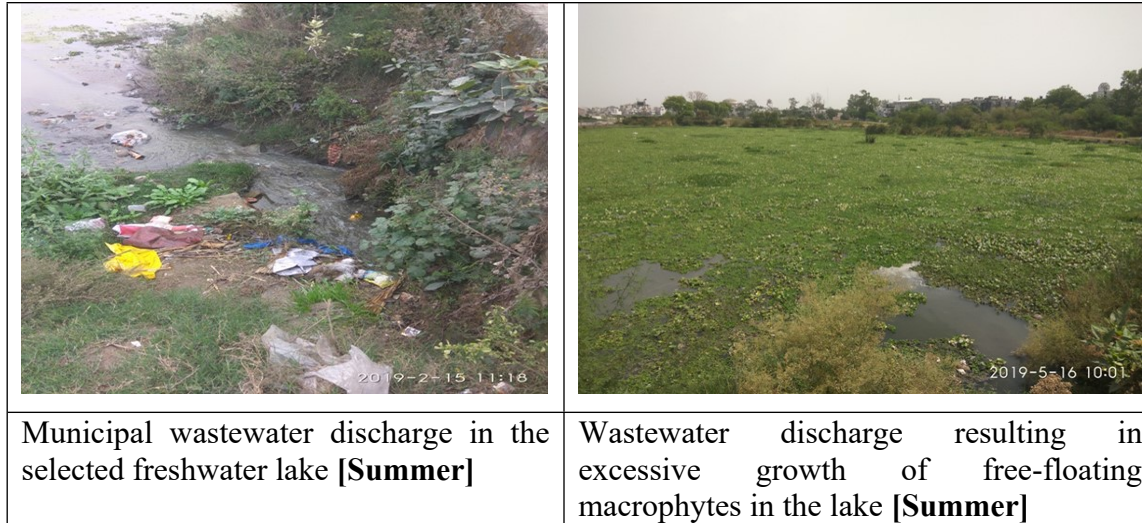

**Supplementary Figure 1:** Pictures showing the condition of the selected lake during the first year of the sampling

**Monsoon Season**

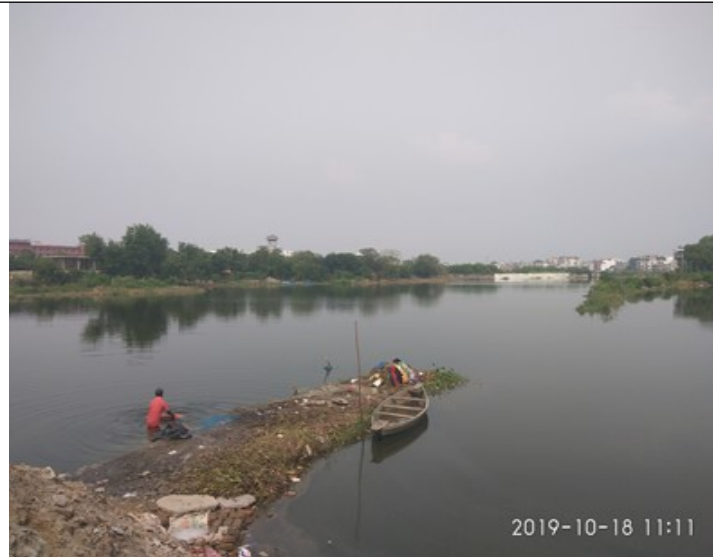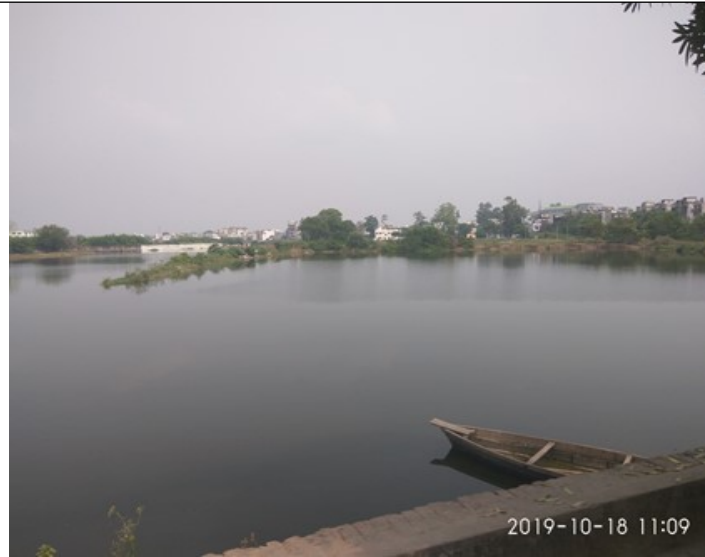

**Winter (Pre-Lockdown) Season**

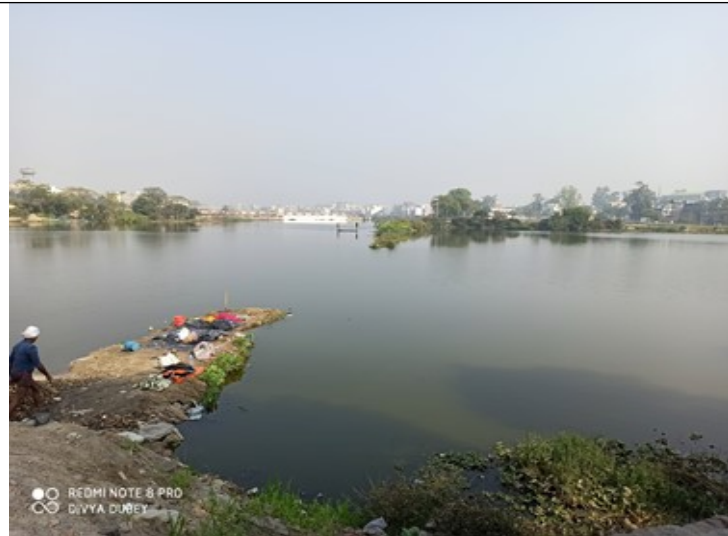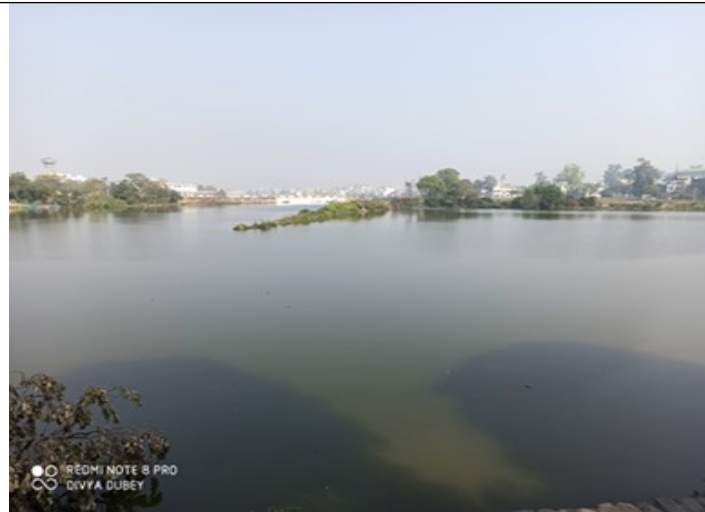

**Monsoon (Post-Lockdown)**

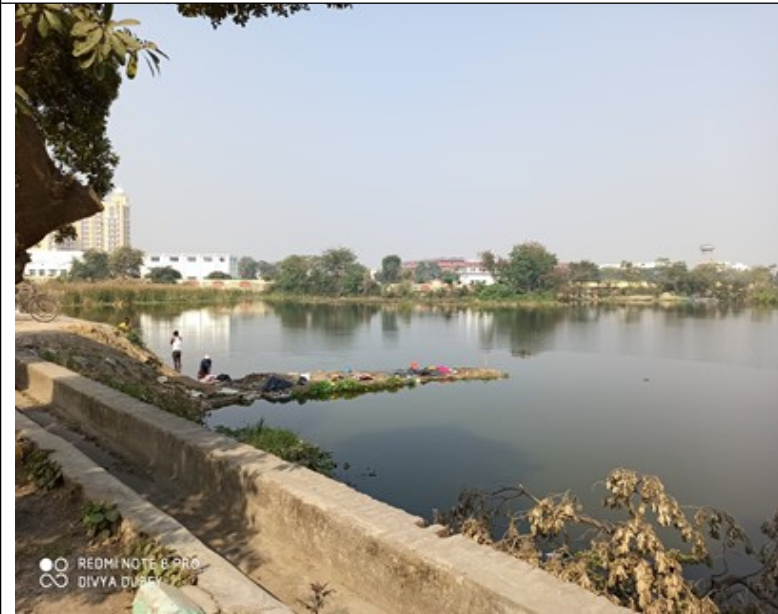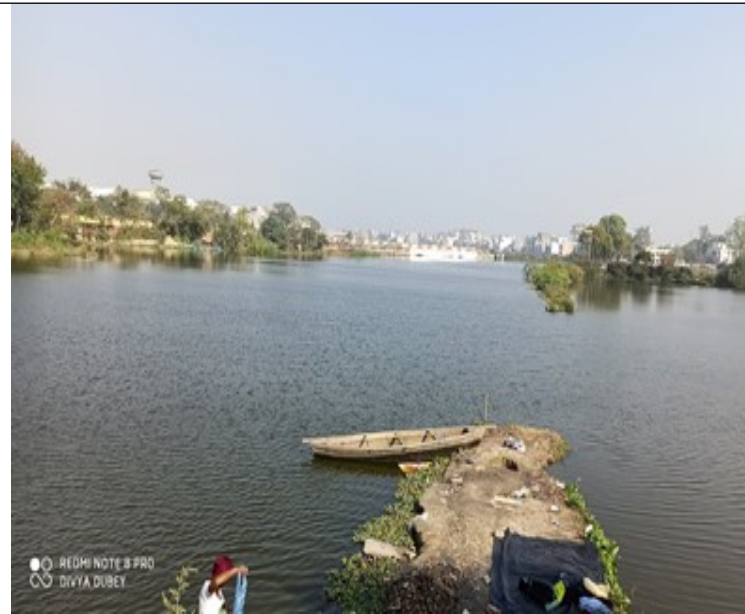

**Supplementary Figure 2:** Pictures showing the condition of the selected lake during the second year of the sampling

**Supplementary Table 1:** Instruments and methods used for estimation of water quality parameter

| S. No | Water parameter                 | Units                | Instruments and methods used              |
|-------|---------------------------------|----------------------|-------------------------------------------|
| 1     | Temp                            | °C                   | Portable meter (TDS-3)                    |
| 2     | pH                              | -                    | Hanna portable meter                      |
| 3     | Secchi Depth (SD)               | Meter (m)            | Secchi Disk                               |
| 4     | TDS                             | ppm                  | Portable meter (TDS-3)                    |
| 5     | TSS                             | mg/l                 | Oven dry method (Maiti., 2003)            |
| 6     | Electrical conductivity (EC)    | $\mu\text{Scm}^{-1}$ | Portable meter                            |
| 7     | Dissolve oxygen (DO)            | mg/l                 | Portable meter (Lutron DO-5509)           |
| 8     | Biochemical oxygen demand (BOD) | mg/l                 | Winkler method (APHA, 2017)               |
| 9     | Alkalinity                      | mg/l                 | Titration method (APHA, 2017)             |
| 10    | Hardness                        | mg/l                 | Titration method (APHA, 2017)             |
| 11    | Nitrate                         | mg/l                 | Spectrophotometric method (APHA, 2017)    |
| 12    | Nitrite                         | mg/l                 | Spectrophotometric method (APHA, 2017)    |
| 13    | Total Phosphorous (TP)          | mg/l                 | Acid digestion method (APHA, 2017)        |
| 14    | Chlorophyll a                   | $\mu\text{g/L}$      | Spectrophotometric method (Marker., 1972) |

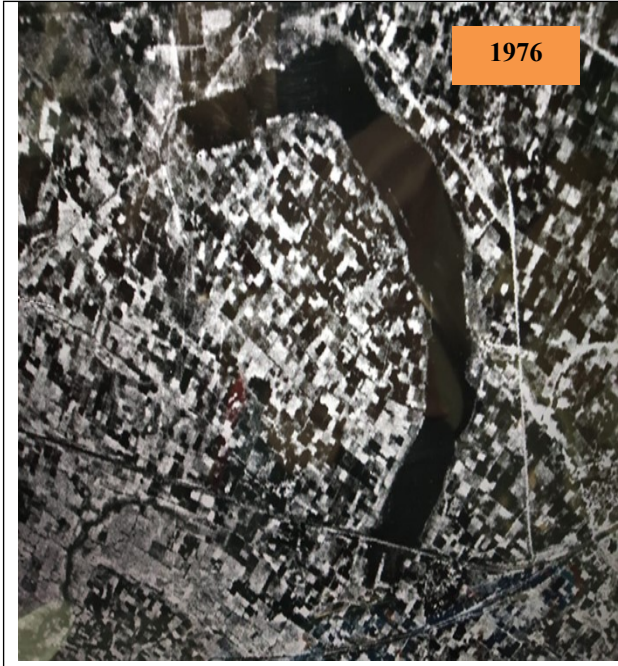

1976

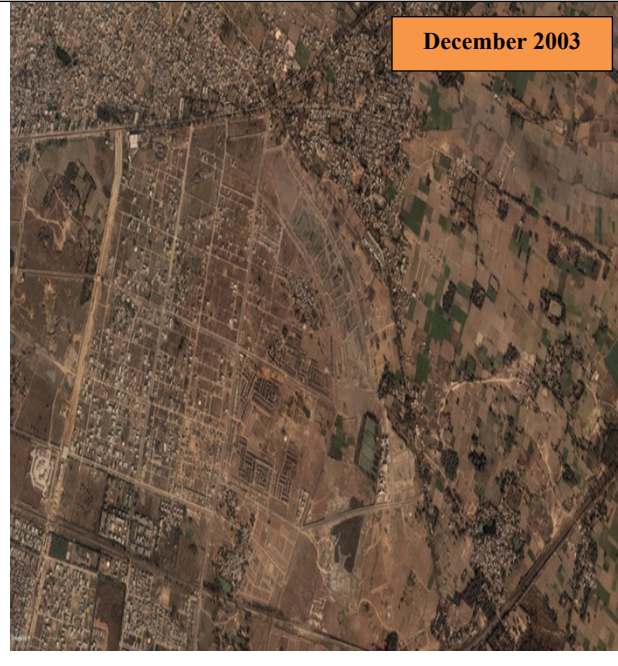

December 2003

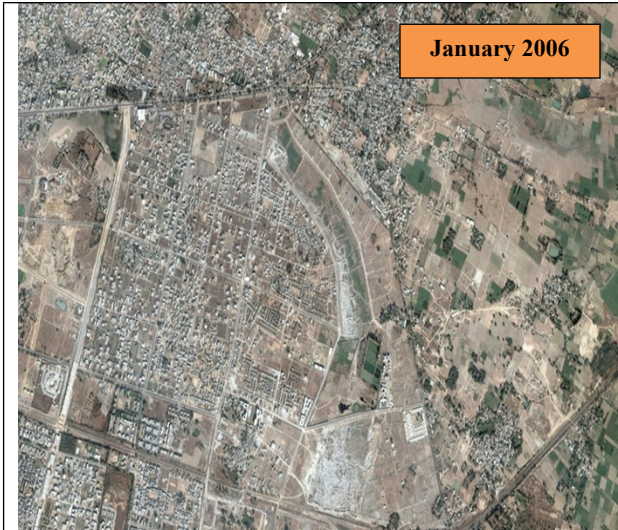

January 2006

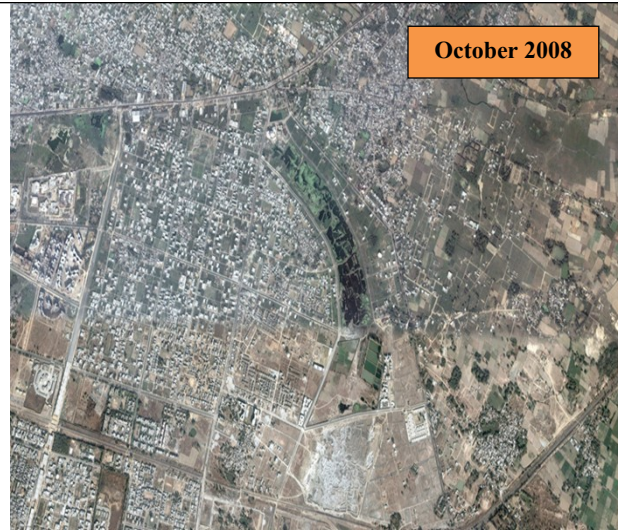

October 2008

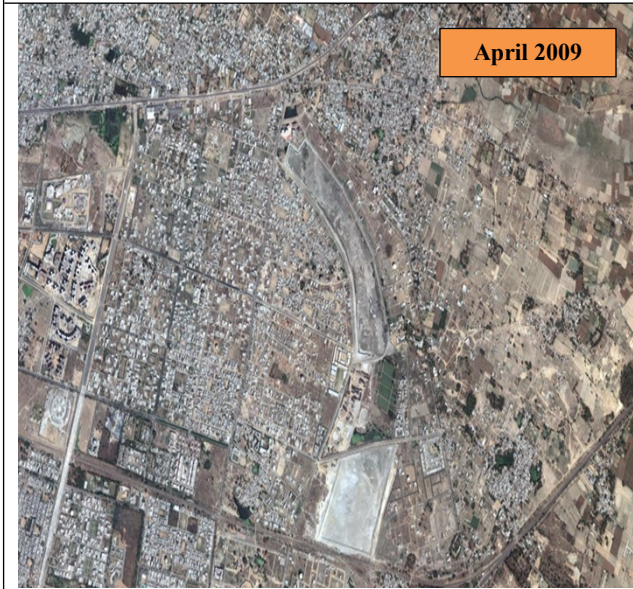

April 2009

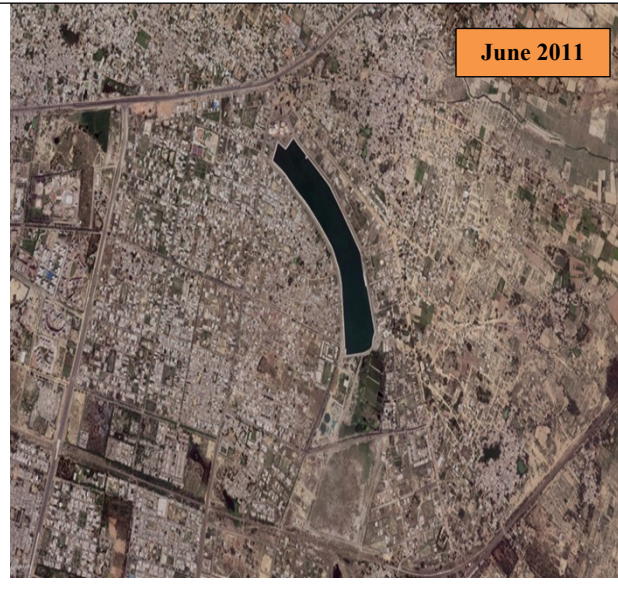

June 2011

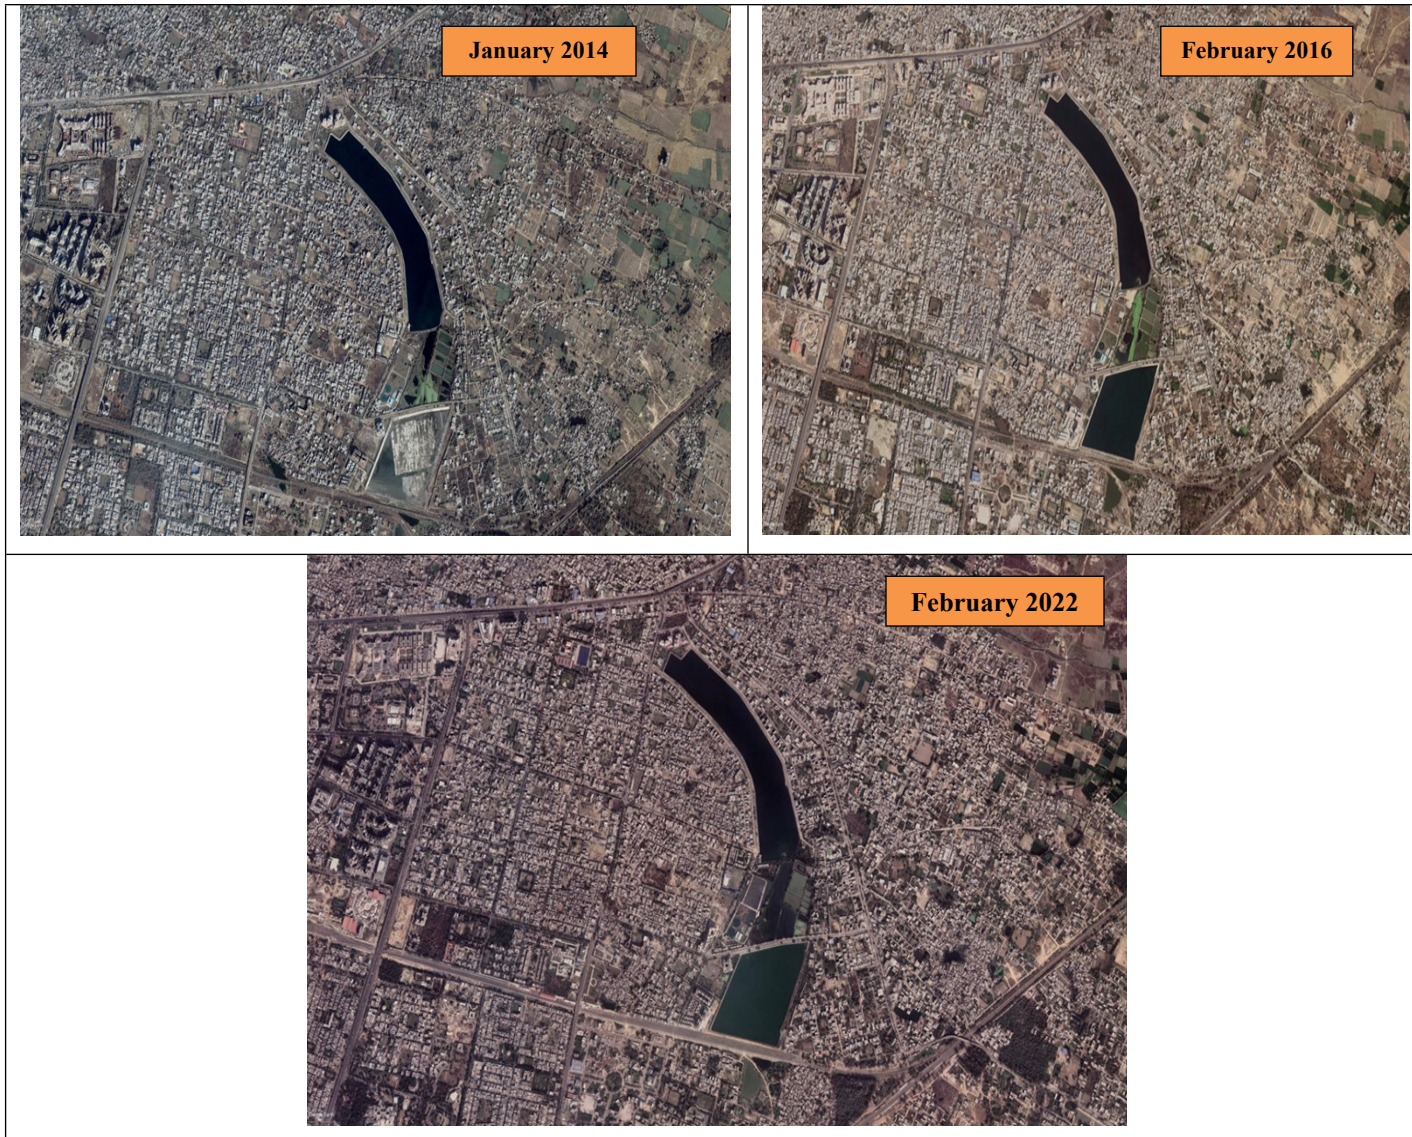

**Supplementary Figure 3:** Satellite images showing the land-use and morphometric changes in the catchment of the Kathauta lake from the year 1976 to 2022



**Temperature, Sunshine Hours and Rainfall data of the Study Area:** Lucknow has a humid subtropical climate with distinct seasons: cool, dry winters from mid-November to February and dry, hot summers from late March to June. The winter season starts in December and extends until the end of February, followed by a hot summer season lasting until the end of June, when the monsoon arrives. The rainy season spans from July to mid-September. In winter, the maximum temperature is around 25°C, while the minimum ranges from 3°C to 7°C. Summers are extremely hot, with temperatures ranging from 40°C to 45°C. The maximum temperature may rise to about 46°C in summer, though the average summer temperature is around 38-39°C. Over 75% of the annual rainfall occurs during the four rainy months from June to September, leading to significant temporal variations. Climate statistics are provided on a monthly basis and for the four seasons: Winter (January-February), Pre-Monsoon (March-May), Southwest (SW) Monsoon (June-September), and Post-Monsoon (October-December). The monsoon continues until September, and the two post-monsoon months of October and November constitute a transition season from monsoon to winter conditions. Most of the rainfall in Lucknow is caused by eastward-moving western disturbances and is often associated with thunderstorms. The average onset date of the southwest monsoon over Lucknow is June 21st. The southwest monsoon typically arrives in the second fortnight of June and withdraws after September 30th. In 2020, the rainfall in Lucknow was 813.86 mm. Although the actual rainfall levels in Lucknow District have fluctuated substantially in recent years, there has been a general decreasing trend from 2001 to 2020, ending at 813.86 mm in 2020. Normal rainfall increases from June with the onset of pre-monsoon activity in the first fortnight and the arrival of the southwest monsoon in the second fortnight. July and August are the rainiest months, but a significant amount of rainfall also occurs in September during the monsoon's retreat. Rainfall decreases drastically from October, with April being the driest month of the year.

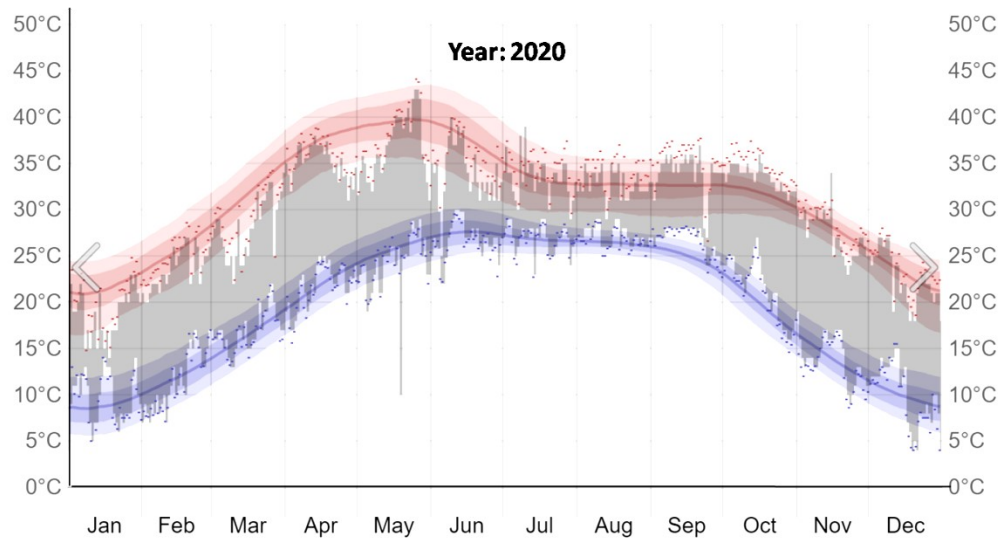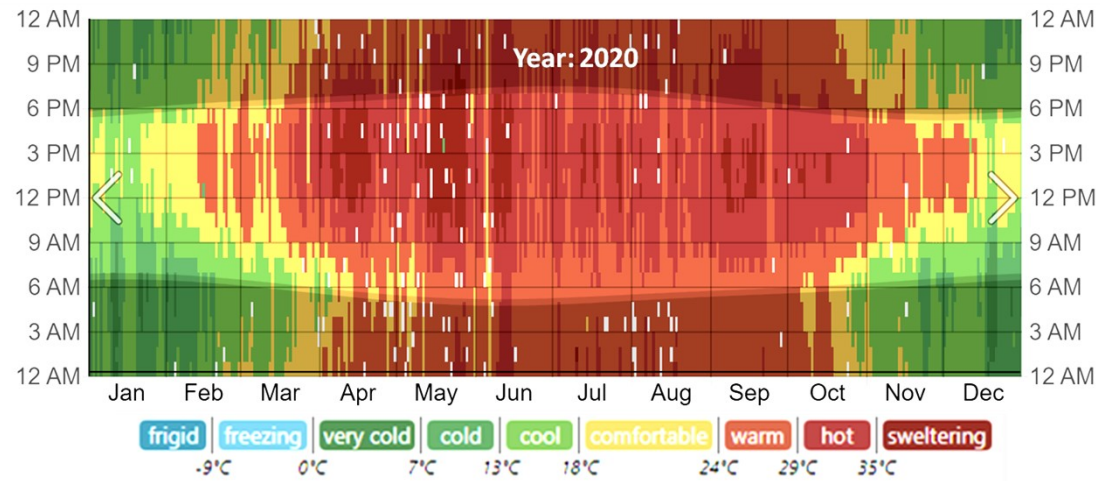

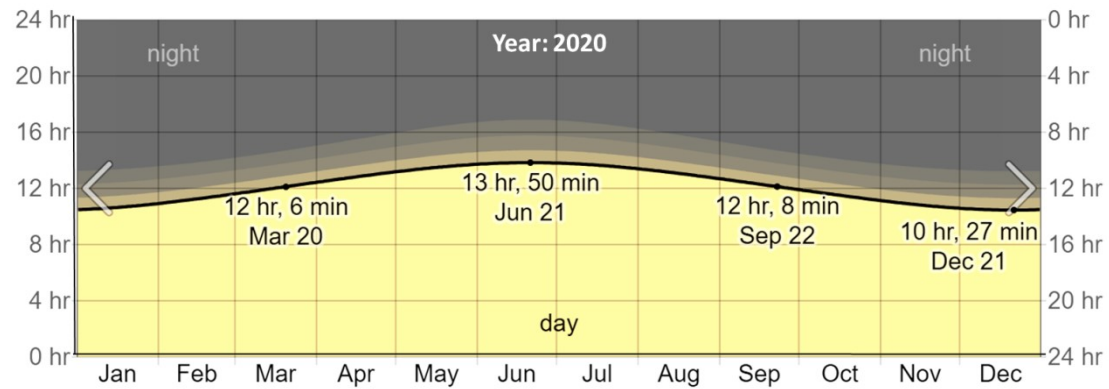

**Supplementary Figure 4 A:** (i) The daily range of reported temperatures for year 2020 (gray bars) and 24-hour highs (red ticks) and lows (blue ticks), placed over the daily average high (faint red line) and low (faint blue line) temperature, with 25th to 75th and 10th to 90th percentile bands (ii) The hourly reported temperature, color coded into bands (iii) The number of sunshine hours during which the Sun is visible (black line)

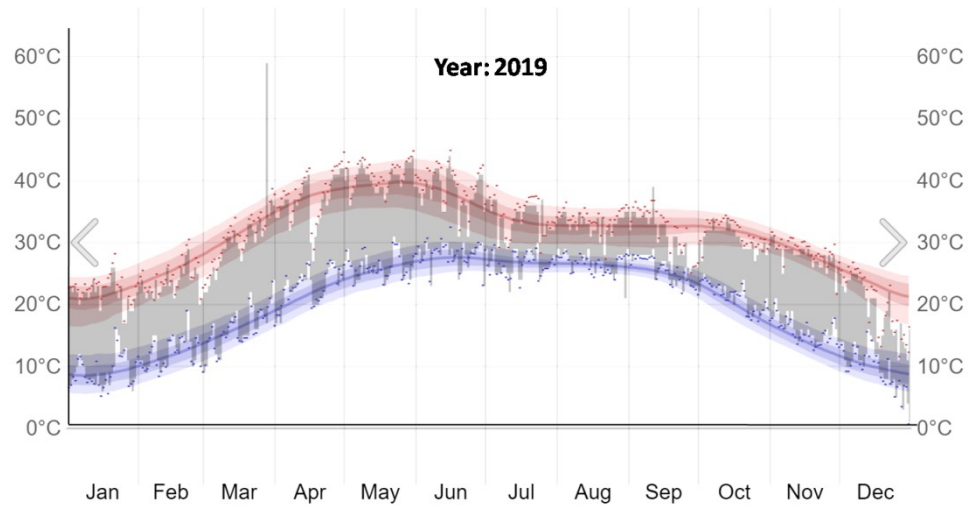

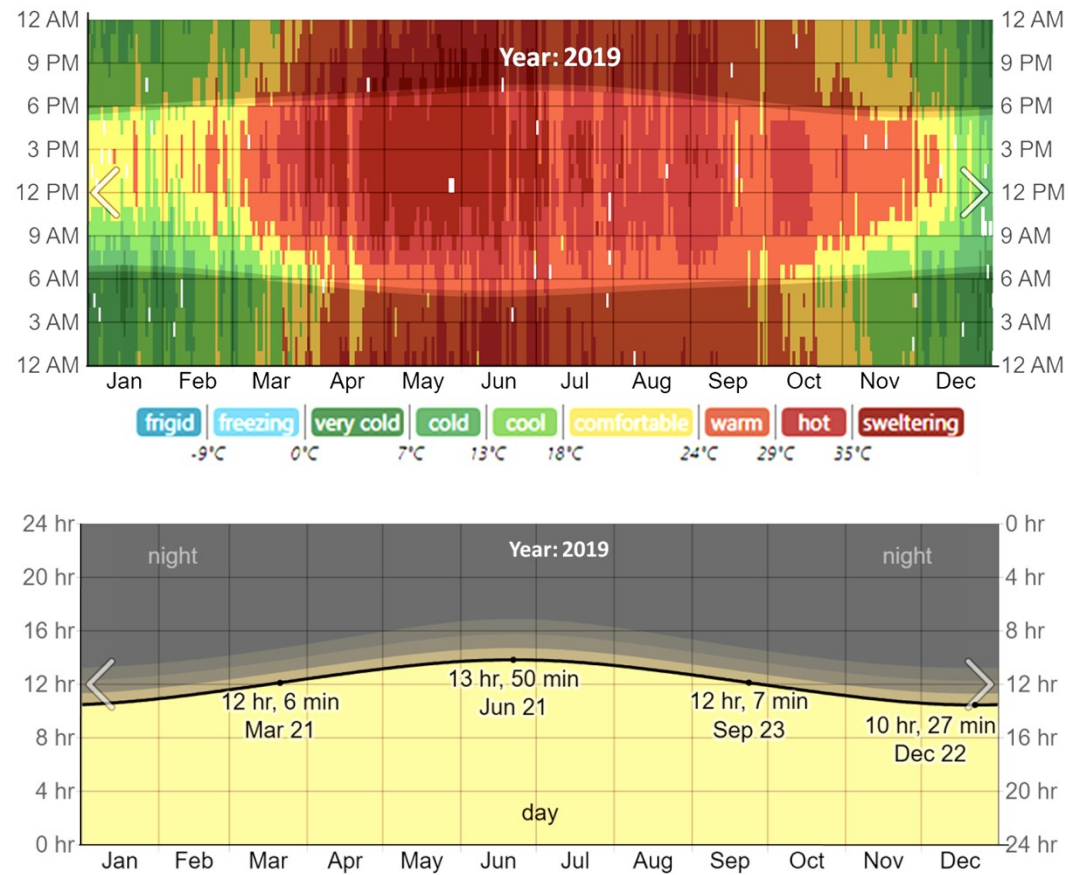

**Supplementary Figure 4B:** (i) The daily range of reported temperatures for year 2019 (gray bars) and 24-hour highs (red ticks) and lows (blue ticks), placed over the daily average high (faint red line) and low (faint blue line) temperature, with 25th to 75th and 10th to 90th percentile bands (ii) The hourly reported temperature, color coded into bands (iii) The number of sunshine hours during which the Sun is visible (black line)

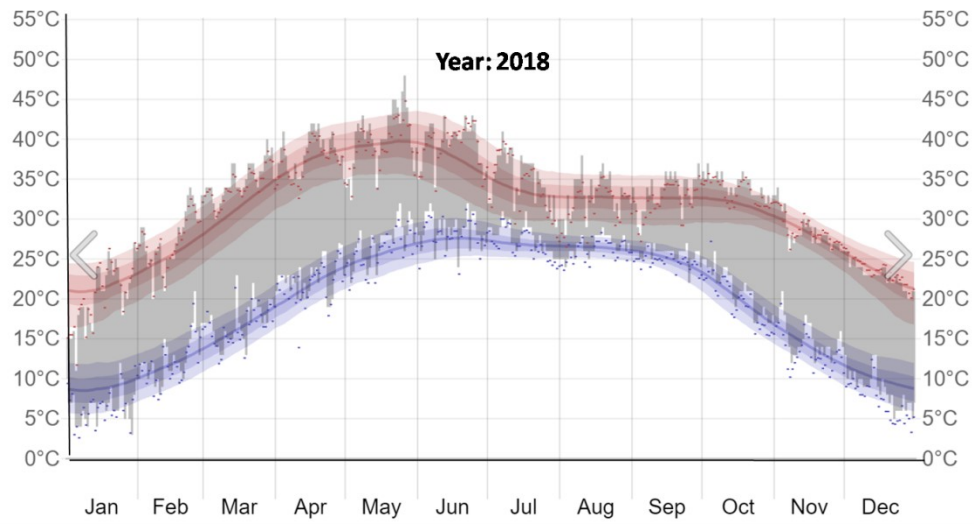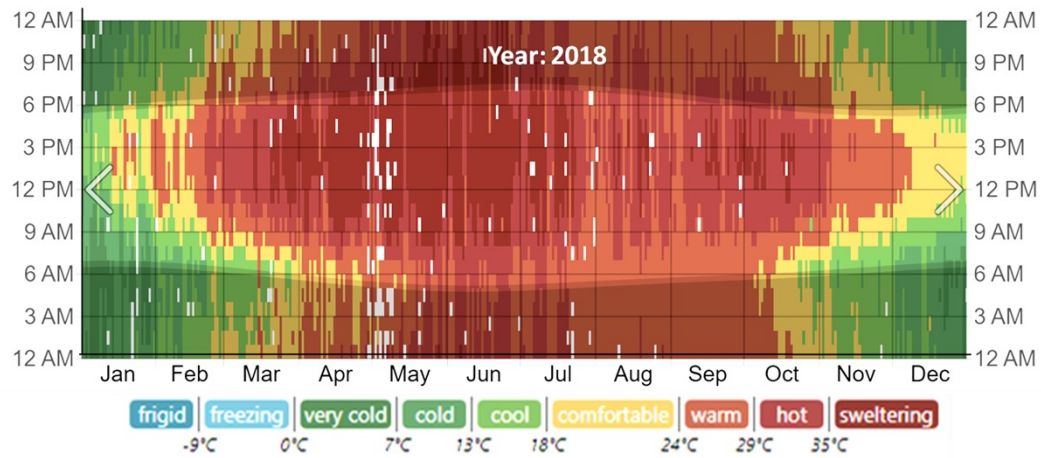

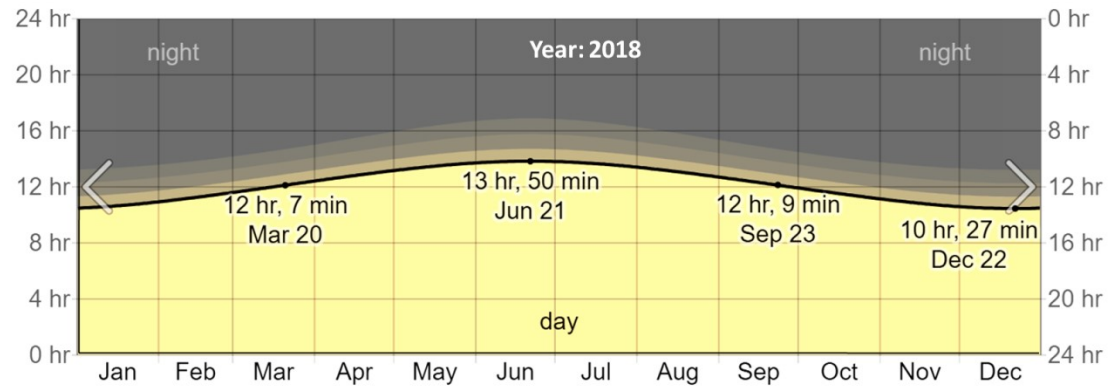

**Supplementary Figure 4C:** (i) The daily range of reported temperatures for year 2018 (gray bars) and 24-hour highs (red ticks) and lows (blue ticks), placed over the daily average high (faint red line) and low (faint blue line) temperature, with 25th to 75th and 10th to 90th percentile bands (ii) The hourly reported temperature, color coded into bands (iii) The number of sunshine hours during which the Sun is visible (black line)

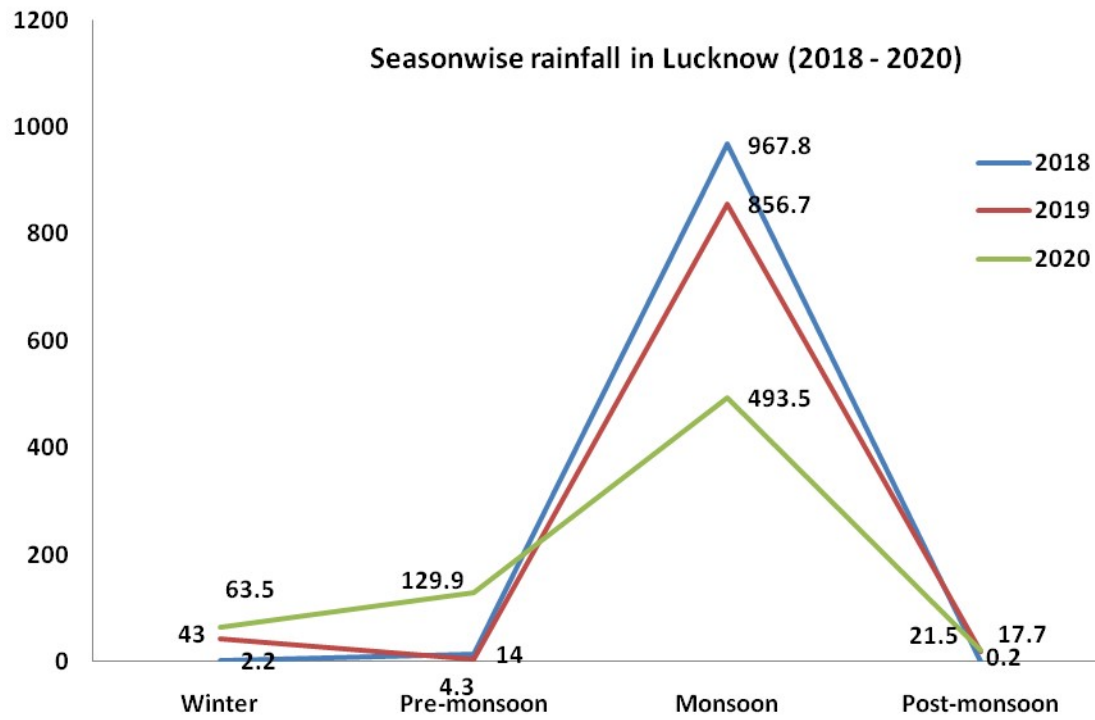

**Supplementary Figure 5A:** Seasonwise rainfall in Lucknow between 2018 and 2020

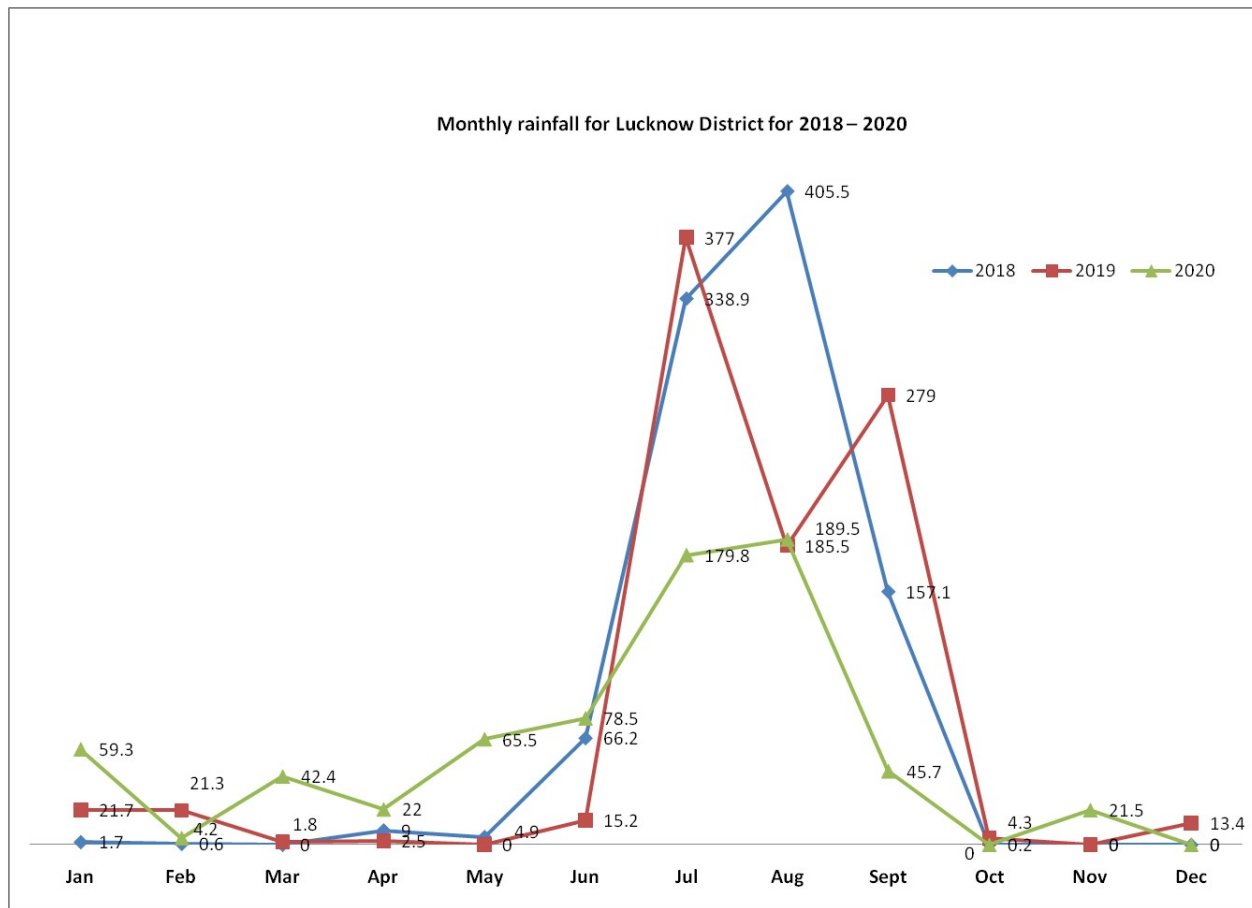

Supplementary Figure 5B: Monthly rainfall for Lucknow District for 2018 – 2020



**Supplementary Table 2:** Physicochemical analysis of water quality of the lake during Monsoon Season (October, 2018) (Dubey et al., 2020)

| Parameter | Temp (°C)                | Ph                     | Secchi Depth (m)         | TDS (ppm)                | EC                        | DO (mg/l)              | BOD (mg/l)              | TSS (mg/l)               | Hardness (mg/l)          | Alkalinity (mg/l)        | Nitrate (mg/l)         | Nitrite (mg/l)         | TP (mg/l)               | Chl a (µg/l)           | Chl b (µg/l)           |
|-----------|--------------------------|------------------------|--------------------------|--------------------------|---------------------------|------------------------|-------------------------|--------------------------|--------------------------|--------------------------|------------------------|------------------------|-------------------------|------------------------|------------------------|
| K1        | 29.67±1.53 <sup>ab</sup> | 5.17±0.15 <sup>a</sup> | 0.38±0.01 <sup>a</sup>   | 158.67±1.15 <sup>b</sup> | 243.33±5.77 <sup>b</sup>  | 2.2±0.2 <sup>a</sup>   | 29.5±1.14 <sup>b</sup>  | 803.33±5.77 <sup>d</sup> | 173.67±3.21 <sup>c</sup> | 240.67±1.54 <sup>f</sup> | 4.11±0.11 <sup>c</sup> | 1.63±0.03 <sup>a</sup> | 20.2±0.2 <sup>d</sup>   | 0.13±0.01 <sup>a</sup> | 0.30±0.02 <sup>b</sup> |
| K2        | 29.33±0.58 <sup>ab</sup> | 7.33±0.12 <sup>c</sup> | 0.78±0.06 <sup>c</sup>   | 176±1.73 <sup>c</sup>    | 274.67±2.89 <sup>cd</sup> | 2.17±0.15 <sup>a</sup> | 33.27±0.25 <sup>c</sup> | 201.33±2.31 <sup>a</sup> | 163.33±2.89 <sup>c</sup> | 53.67±1.53 <sup>b</sup>  | 3.02±0.02 <sup>b</sup> | 1.81±0.01 <sup>a</sup> | 4.3±0.17 <sup>bc</sup>  | 0.08±0.01 <sup>a</sup> | 0.05±0.03 <sup>a</sup> |
| K3        | 28.33±0.58 <sup>a</sup>  | 7.2±0.1 <sup>b</sup>   | 0.40±0.01 <sup>a</sup>   | 121.33±2.31 <sup>a</sup> | 189.67±2.89 <sup>a</sup>  | 2.53±0.12 <sup>a</sup> | 18.2±0.2 <sup>a</sup>   | 603.33±5.77 <sup>b</sup> | 155.67±4.04 <sup>b</sup> | 41.33±2.31 <sup>a</sup>  | 2.65±0.01 <sup>a</sup> | 1.67±0.02 <sup>a</sup> | 4.1±0.09 <sup>ab</sup>  | 0.16±0.01 <sup>a</sup> | 0.23±0.03 <sup>b</sup> |
| K4        | 31.67±1.53 <sup>b</sup>  | 6.77±0.25 <sup>b</sup> | 0.42±0.01 <sup>a</sup>   | 174±3.46 <sup>c</sup>    | 271.66±5.77 <sup>c</sup>  | 4.5±0.26 <sup>b</sup>  | 70.23±0.68 <sup>d</sup> | 605.33±5.51 <sup>b</sup> | 171±1.73 <sup>a</sup>    | 172.33±2.52 <sup>e</sup> | 4.71±0.18 <sup>d</sup> | 2.31±0.02 <sup>b</sup> | 4.52±0.03 <sup>c</sup>  | 5.03±0.03 <sup>e</sup> | 4.22±0.02 <sup>d</sup> |
| K5        | 29.33±0.58 <sup>ab</sup> | 8.43±0.21 <sup>d</sup> | 0.64 ± 0.01 <sup>b</sup> | 182±1.73 <sup>d</sup>    | 285.67±4.04 <sup>de</sup> | 5.33±0.15 <sup>c</sup> | 73.7±1.28 <sup>e</sup>  | 801.67±2.89 <sup>d</sup> | 191±1.73 <sup>ab</sup>   | 159.67±2.52 <sup>d</sup> | 8.18±0.17 <sup>e</sup> | 2.35±0.32 <sup>b</sup> | 4.02±0.03 <sup>ab</sup> | 6.08±0.07 <sup>d</sup> | 4.67±0.15 <sup>e</sup> |
| K6        | 30.67±0.58 <sup>ab</sup> | 8.07±0.06 <sup>d</sup> | 0.59 ± 0.01 <sup>b</sup> | 184±1 <sup>d</sup>       | 287±2 <sup>e</sup>        | 5.9±0.17 <sup>d</sup>  | 30.27±0.25 <sup>b</sup> | 749±3.61 <sup>c</sup>    | 152.33±2.52 <sup>a</sup> | 73.33±1.53 <sup>c</sup>  | 3.26±0.14 <sup>b</sup> | 2.66±0.05 <sup>b</sup> | 3.72±0.19 <sup>a</sup>  | 4.46±0.01 <sup>b</sup> | 3.39±0.03 <sup>c</sup> |
| Average   | 29.83                    | 7.16                   | 0.54                     | 166                      | 258.67                    | 3.77                   | 42.53                   | 627.33                   | 167.83                   | 123.5                    | 4.32                   | 2.07                   | 6.81                    | 2.66                   | 2.14                   |

Note: Different alphabetical letters as superscript specify significant differences among different sites of the selected lakes at p<0.05.

**Supplementary Table 3: Physicochemical analysis of water quality of the lake during winter season (January, 2019)**

| Parameter      | Temp (°C)               | pH                     | SD (m)                  | TDS (ppm)                | EC                       | DO (mg/l)               | BOD (mg/l)              | TSS (mg/l)               | Hardness (mg/l)          | Alkalinity (mg/l)        | Nitrate (mg/l)           | Nitrite (mg/l)         | TP (mg/l)              | Chl a (µg/l)            | Chl b (µg/l)           |
|----------------|-------------------------|------------------------|-------------------------|--------------------------|--------------------------|-------------------------|-------------------------|--------------------------|--------------------------|--------------------------|--------------------------|------------------------|------------------------|-------------------------|------------------------|
| <b>K1</b>      | 18.67±1.53 <sup>b</sup> | 7.67±0.58 <sup>a</sup> | 0.38±0.01 <sup>ab</sup> | 182.67±2.52 <sup>a</sup> | 285.4±3.93 <sup>a</sup>  | 1.17±0.21 <sup>c</sup>  | 12.21±1.05 <sup>a</sup> | 221.67±7.64 <sup>b</sup> | 170.67±15 <sup>c</sup>   | 111.33±15 <sup>a</sup>   | 4.39±0.45 <sup>a</sup>   | 2.25±0.25 <sup>a</sup> | 2.45±0.05 <sup>a</sup> | 0.55±0.05 <sup>c</sup>  | 0.02±0.01 <sup>a</sup> |
| <b>K2</b>      | 19.33±0.58 <sup>b</sup> | 7.13±0.12 <sup>a</sup> | 0.37±0.02 <sup>a</sup>  | 256.33±1.15 <sup>b</sup> | 400.52±1.81 <sup>b</sup> | 0.9±0.10 <sup>bc</sup>  | 31.31±1.75 <sup>a</sup> | 265.33±5.03 <sup>c</sup> | 189±3.61 <sup>d</sup>    | 161.33±4.16 <sup>b</sup> | 6.25±0.26 <sup>ab</sup>  | 3.91±0.37 <sup>a</sup> | 3.8±0.26 <sup>b</sup>  | 1.25±0.05 <sup>d</sup>  | 0.02±0.01 <sup>a</sup> |
| <b>K3</b>      | 18.67±0.58 <sup>b</sup> | 7.13±0.12 <sup>a</sup> | 0.40±0.01 <sup>b</sup>  | 178.67±1.15 <sup>a</sup> | 279.16±1.81 <sup>a</sup> | 0.27±0.12 <sup>a</sup>  | 30.57±0.55 <sup>b</sup> | 161.33±4.62 <sup>a</sup> | 157±2.65 <sup>a</sup>    | 187.67±2.52 <sup>c</sup> | 8.89±0.36 <sup>abc</sup> | 2.81±0.31 <sup>a</sup> | 4.66±0.39 <sup>a</sup> | 0.32±0.03 <sup>ab</sup> | 0.04±0.01 <sup>a</sup> |
| <b>K4</b>      | 19.33±0.58 <sup>b</sup> | 7.1±0.10 <sup>a</sup>  | 0.38±0.01 <sup>ab</sup> | 277.67±2.31 <sup>c</sup> | 433.85±3.61 <sup>c</sup> | 0.67±0.06 <sup>ab</sup> | 29.29±3.50 <sup>a</sup> | 162±10.39 <sup>a</sup>   | 210±10 <sup>c</sup>      | 184.33±4.04 <sup>c</sup> | 11.17±3.69 <sup>c</sup>  | 3.77±1.51 <sup>a</sup> | 2.5±0.70 <sup>b</sup>  | 0.22±0.11 <sup>a</sup>  | 0.04±0.01 <sup>a</sup> |
| <b>K5</b>      | 15±1 <sup>a</sup>       | 7.1±0.10 <sup>a</sup>  | 0.38±0.01 <sup>ab</sup> | 272.67±3.06 <sup>c</sup> | 425.75±5.17 <sup>c</sup> | 0.63±0.23 <sup>ab</sup> | 35.35±1.75 <sup>a</sup> | 165.33±4.62 <sup>a</sup> | 226.67±5.77 <sup>f</sup> | 112±3.46 <sup>a</sup>    | 6.3±1.93 <sup>ab</sup>   | 3.85±0.15 <sup>a</sup> | 3.77±0.12 <sup>a</sup> | 1.22±0.01 <sup>d</sup>  | 0.25±0.36 <sup>a</sup> |
| <b>K6</b>      | 18±1.73 <sup>ab</sup>   | 7.1±0.12 <sup>a</sup>  | 0.40±0.01 <sup>b</sup>  | 272.67±1.73 <sup>d</sup> | 448.43±2.71 <sup>d</sup> | 1.03±0.15 <sup>bc</sup> | 21.21±1.05 <sup>a</sup> | 170.33±4.04 <sup>a</sup> | 143.33±5.77 <sup>b</sup> | 118.67±15 <sup>a</sup>   | 9.72±0.33 <sup>bc</sup>  | 2.76±1.08 <sup>a</sup> | 3.01±0.86 <sup>b</sup> | 0.44±0.04 <sup>bc</sup> | 0.02±0.01 <sup>a</sup> |
| <b>Average</b> | 18.17                   | 7.21                   | 0.39                    | 240.11                   | 378.85                   | 0.78                    | 26.66                   | 191                      | 182.78                   | 145.89                   | 7.78                     | 3.23                   | 21.21                  | 0.67                    | 0.07                   |

Note: Different alphabetical letters as superscript specify significant differences among different sites of the selected lakes at p<0.05.

**Supplementary Table 4:** Physicochemical analysis of water quality of the lake during summer season (May, 2020)

| Parameter      | Temp(°C)                | Ph                      | SD (m)                   | TDS (ppm)                 | EC                        | DO (mg/l)              | BOD (mg/l)                | TSS (mg/l)                | Hardness (mg/l)           | Alkalinity (mg/l)        | Nitrate (mg/l)          | Nitrite (mg/l)          | TP (mg/l)                | Chl a (µg/l)            | Chl b (µg/l)            |
|----------------|-------------------------|-------------------------|--------------------------|---------------------------|---------------------------|------------------------|---------------------------|---------------------------|---------------------------|--------------------------|-------------------------|-------------------------|--------------------------|-------------------------|-------------------------|
| <b>K1</b>      | 31.33±1.15 <sup>a</sup> | 7.7±0.20 <sup>bc</sup>  | 0.45±0.02 <sup>ab</sup>  | 197.33±2.31 <sup>c</sup>  | 308.33±3.61 <sup>c</sup>  | 3.8±0.17 <sup>b</sup>  | 39.06±5.83 <sup>a</sup>   | 206.67±11.55 <sup>b</sup> | 160.33±5.51 <sup>a</sup>  | 32±3.46 <sup>a</sup>     | 3.93±0.55 <sup>ab</sup> | 2.64±0.78 <sup>ab</sup> | 3.73±0.50 <sup>a</sup>   | 0.37±0.05 <sup>ab</sup> | 0.39±0.06 <sup>ab</sup> |
| <b>K2</b>      | 31.67±1.53 <sup>a</sup> | 7.47±0.25 <sup>ab</sup> | 0.44±0.01 <sup>a</sup>   | 114.67±4.62 <sup>a</sup>  | 179.17±7.22 <sup>a</sup>  | 5.88±0.15 <sup>c</sup> | 113.13±55.99 <sup>b</sup> | 63.33±15.28 <sup>a</sup>  | 165.67±5.13 <sup>a</sup>  | 59±16.52 <sup>bc</sup>   | 3.16±0.66 <sup>a</sup>  | 2.47±0.16 <sup>ab</sup> | 12.72±0.75 <sup>d</sup>  | 0.55±0.10 <sup>ab</sup> | 0.44±0.12 <sup>ab</sup> |
| <b>K3</b>      | 31±1 <sup>a</sup>       | 7.77±0.23 <sup>bc</sup> | 0.5 ± 0.02 <sup>bc</sup> | 197.33±2.31 <sup>c</sup>  | 308.33±3.61 <sup>c</sup>  | 2.4±0.26 <sup>a</sup>  | 26.93±4.66 <sup>a</sup>   | 166.67±7.67 <sup>b</sup>  | 176±14.42 <sup>a</sup>    | 45±5 <sup>abc</sup>      | 5.35±0.14 <sup>b</sup>  | 1.50±0.05 <sup>a</sup>  | 7.6±0.17 <sup>c</sup>    | 0.45±0.18 <sup>ab</sup> | 0.58±0.07 <sup>bc</sup> |
| <b>K4</b>      | 31.67±1.53 <sup>a</sup> | 7.13±0.06 <sup>a</sup>  | 0.55 ± 0.02 <sup>c</sup> | 231±5.20 <sup>d</sup>     | 360.93±8.12 <sup>d</sup>  | 1.8±0.17 <sup>a</sup>  | 47.34±13.01 <sup>ab</sup> | 193±11.27 <sup>b</sup>    | 189.67±9.50 <sup>a</sup>  | 63.33±10.41 <sup>c</sup> | 3.48±0.97 <sup>ab</sup> | 5.96±0.04 <sup>c</sup>  | 4.917±1.27 <sup>ab</sup> | 0.3±0.05 <sup>a</sup>   | 0.28±0.07 <sup>a</sup>  |
| <b>K5</b>      | 31.67±1.53 <sup>a</sup> | 7.47±0.25 <sup>ab</sup> | 0.69±0.03 <sup>d</sup>   | 185.33±4.04 <sup>b</sup>  | 289.58±6.32 <sup>b</sup>  | 3.4±0.53 <sup>b</sup>  | 43.09±9.33 <sup>a</sup>   | 390±36.06 <sup>c</sup>    | 180±20 <sup>a</sup>       | 30±10 <sup>a</sup>       | 3.11±0.71 <sup>a</sup>  | 3.93±0.51 <sup>b</sup>  | 6.88±0.77 <sup>bc</sup>  | 0.43±0.14 <sup>ab</sup> | 0.46±0.09 <sup>ab</sup> |
| <b>K6</b>      | 31.67±1.53 <sup>a</sup> | 8.1±0.17 <sup>c</sup>   | 0.70±0.01 <sup>d</sup>   | 187.33±2.31 <sup>bc</sup> | 292.71±3.61 <sup>bc</sup> | 4.13±0.32 <sup>b</sup> | 44.44±6.31 <sup>a</sup>   | 216.67±28.87 <sup>b</sup> | 183.33±15.28 <sup>a</sup> | 33.33±5.77 <sup>ab</sup> | 2.68±0.83 <sup>a</sup>  | 2.29±1.16 <sup>ab</sup> | 6.59±0.48 <sup>bc</sup>  | 0.66±0.11 <sup>b</sup>  | 0.79±0.09 <sup>c</sup>  |
| <b>Average</b> | 31.5                    | 7.61                    | 0.56                     | 185.5                     | 289.84                    | 3.57                   | 52.32                     | 206.06                    | 175.83                    | 43.78                    | 3.62                    | 3.13                    | 7.07                     | 0.46                    | 0.49                    |

Note: Different alphabetical letters as superscript specify significant differences among different sites of the selected lakes at p<0.05.

**Supplementary Table 5:** Physicochemical analysis of water quality of the lake during Monsoon Season (October, 2019)

| Parameter      | Temp (°C)                | Ph                      | Secchi Depth (m)       | TDS (ppm)                  | EC (µS/cm)                 | DO (mg/l)              | BOD (mg/l)                | TSS (mg/l)                 | Hardness (mg/l)            | Phenol (mg/l) | Meth Alk (mg/l)           | Total Alk (mg/l)          | Nitrate (mg/l)         | Nitrite (mg/l)          | TP (mg/l)                | Chl a (µg/l)           | Chl b (µg/l)           |
|----------------|--------------------------|-------------------------|------------------------|----------------------------|----------------------------|------------------------|---------------------------|----------------------------|----------------------------|---------------|---------------------------|---------------------------|------------------------|-------------------------|--------------------------|------------------------|------------------------|
| <b>K1</b>      | 28.33 ±0.58 <sub>a</sub> | 7.57±0.06 <sup>a</sup>  | 0.23±0.06 <sup>a</sup> | 164±3.61 <sup>bc</sup>     | 256.25 ±5.63 <sup>bc</sup> | 4.63±0.15 <sup>a</sup> | 45.5±0.44 <sup>a</sup>    | 603.33 ±5.77 <sup>d</sup>  | 145.67 ±0.58 <sup>a</sup>  | 0             | 261.08 ±1.16 <sup>c</sup> | 261.08 ±1.16 <sup>c</sup> | 5.58±0.37 <sup>d</sup> | 5.50±0.45 <sup>a</sup>  | 7.68±4.88 <sup>a</sup>   | 1.03±0.01 <sup>b</sup> | 1.31±0.12 <sup>b</sup> |
| <b>K2</b>      | 27±1.73 <sup>a</sup>     | 7.73±0.21 <sup>ab</sup> | 0.28±0.02 <sup>a</sup> | 156.33 ±1.15 <sup>b</sup>  | 244.27 ±1.81 <sup>b</sup>  | 9.33±0.58 <sup>c</sup> | 70.8±1.04 <sup>c</sup>    | 403.33 ±5.77 <sup>a</sup>  | 175.67 ±0.58 <sup>bc</sup> | 0             | 246.92 ±3.06 <sup>b</sup> | 246.92 ±3.06 <sup>b</sup> | 3.56±0.22 <sup>b</sup> | 6.27±0.25 <sup>ab</sup> | 11.07±10.06 <sup>a</sup> | 0.39±0.06 <sup>a</sup> | 0.46±0.01 <sup>a</sup> |
| <b>K3</b>      | 29.33 ±0.58 <sub>a</sub> | 8.13±0.12 <sup>bc</sup> | 0.28±0.02 <sup>a</sup> | 138.67 ±1.15 <sup>a</sup>  | 216.67 ±1.80 <sup>a</sup>  | 7.13±0.06 <sup>b</sup> | 60.47 ±0.12 <sup>b</sup>  | 496.67 ±15.28 <sup>c</sup> | 153.33 ±5.77 <sup>a</sup>  | 0             | 216.88 ±2.72 <sup>a</sup> | 216.88 ±2.73 <sup>a</sup> | 2.85±0.13 <sup>a</sup> | 7.40±0.52 <sup>b</sup>  | 9.32±5.58 <sup>a</sup>   | 1.39±0.09 <sup>c</sup> | 1.46±0.03 <sup>b</sup> |
| <b>K4</b>      | 28.67 ±1.15 <sub>a</sub> | 8.57±0.06 <sup>cd</sup> | 0.27±0.12 <sup>a</sup> | 167±1.73 <sup>c</sup>      | 260.94 ±2.71 <sup>c</sup>  | 6.67±0.29 <sup>b</sup> | 52.07 ±2.54 <sup>ab</sup> | 603.33 ±5.77 <sup>d</sup>  | 193.33 ±5.77 <sup>c</sup>  | 0             | 265±4.33 <sup>c</sup>     | 265±4.33 <sup>c</sup>     | 3.76±0.26 <sup>b</sup> | 7.56±0.87 <sup>b</sup>  | 23.63±15.10 <sup>a</sup> | 0.33±0.18 <sup>a</sup> | 0.48±0.07 <sup>a</sup> |
| <b>K5</b>      | 29.33 ±0.58 <sub>a</sub> | 8.4±0.36 <sup>cd</sup>  | 0.22±0.03 <sup>a</sup> | 165.33 ±4.04 <sup>bc</sup> | 258.34 ±6.32 <sup>bc</sup> | 6.6±0.35 <sup>b</sup>  | 56.83 ±7.07 <sup>b</sup>  | 443.33 ±5.77 <sup>b</sup>  | 180±17.32 <sup>bc</sup>    | 0             | 256.46 ±3.07 <sup>c</sup> | 256.46 ±2.50 <sup>c</sup> | 3.75±0.22 <sup>b</sup> | 6.94±0.05 <sup>ab</sup> | 4.67±0.89 <sup>a</sup>   | 0.41±0.03 <sup>a</sup> | 0.40±0.02 <sup>a</sup> |
| <b>K6</b>      | 28.67 ±1.15 <sub>a</sub> | 8.8±0.17 <sup>d</sup>   | 0.29±0.01 <sup>a</sup> | 183.33 ±5.77 <sup>d</sup>  | 286.46 ±9.02 <sup>d</sup>  | 6.3±0.17 <sup>b</sup>  | 55.2±1.56 <sup>b</sup>    | 503.33 ±5.77 <sup>c</sup>  | 161.33 ±1.15 <sup>ab</sup> | 0             | 284.17 ±5.05 <sup>d</sup> | 284.17 ±5.05 <sup>d</sup> | 4.73±0.24 <sup>c</sup> | 7.62±0.78 <sup>b</sup>  | 1.81±0.45 <sup>a</sup>   | 0.48±0.21 <sup>a</sup> | 0.64±0.11 <sup>a</sup> |
| <b>Average</b> | 28.56                    | 8.2                     | 0.26                   | 162.44                     | 253.82                     | 6.78                   | 56.81                     | 508.89                     | 168.22                     | 0             | 255.09                    | 255.09                    | 4.04                   | 6.88                    | 9.7                      | 0.67                   | 0.79                   |

Note: Different alphabetical letters as superscript specify significant differences among different sites of the selected lakes at p<0.05.

**Supplementary Table 6:** Physicochemical analysis of water quality of the lake during winter season (January, 2020)

| Parameter      | Temp (°C)                   | Ph                         | Secchi Depth (m)           | TDS (ppm)                    | EC (µS/cm)                    | DO (mg/l)                   | BOD (mg/l)                  | TSS (mg/l)                   | Hardness (mg/l)                | Phenol (mg/l) | Meth Alk (mg/l)              | Total Alk (mg/l)             | Nitrate (mg/l)             | Nitrite (mg/l)             | TP (mg/l)                    | Chl a (µg/l)               | Chl b (µg/l)                |
|----------------|-----------------------------|----------------------------|----------------------------|------------------------------|-------------------------------|-----------------------------|-----------------------------|------------------------------|--------------------------------|---------------|------------------------------|------------------------------|----------------------------|----------------------------|------------------------------|----------------------------|-----------------------------|
| <b>K2</b>      | 20.67<br>±0.58 <sup>a</sup> | 8.57±<br>0.06 <sup>b</sup> | 0.37±<br>0.02 <sup>a</sup> | 192±1.<br>73 <sup>a</sup>    | 300±2.<br>70 <sup>a</sup>     | 5.2±1<br>.91 <sup>ab</sup>  | 39.53<br>±1.15 <sup>a</sup> | 446.67<br>±5.77 <sup>b</sup> | 140.67±<br>1.15 <sup>ab</sup>  | 0             | 31.66±<br>2.89 <sup>a</sup>  | 31.67±<br>2.89 <sup>a</sup>  | 4.21±0.<br>18 <sup>c</sup> | 3.27±0<br>.23 <sup>b</sup> | 19.47±<br>1.27 <sup>b</sup>  | 2.17±<br>0.14 <sup>b</sup> | 1.33±<br>0.05 <sup>ab</sup> |
| <b>K3</b>      | 20.67<br>±0.58 <sup>a</sup> | 8.47±<br>0.06 <sup>b</sup> | 0.37±<br>0.02 <sup>a</sup> | 190.67<br>±1.15 <sup>a</sup> | 297.92<br>±1.80 <sup>a</sup>  | 6.57±<br>0.06 <sup>b</sup>  | 65.17<br>±1.26 <sup>c</sup> | 503.33<br>±5.77 <sup>c</sup> | 146.67±<br>5.77 <sup>bc</sup>  | 0             | 43.33±<br>5.77 <sup>bc</sup> | 43.33±<br>5.77 <sup>bc</sup> | 3.21±0.<br>18 <sup>a</sup> | 3.49±0<br>.08 <sup>b</sup> | 17±1.7<br>3 <sup>ab</sup>    | 1.37±<br>0.01 <sup>a</sup> | 1.21±<br>0.01 <sup>ab</sup> |
| <b>K4</b>      | 20.67<br>±0.58 <sup>a</sup> | 8.2±0<br>.17 <sup>a</sup>  | 0.41±<br>0.01 <sup>b</sup> | 204±5.<br>20 <sup>bc</sup>   | 318.75<br>±8.12 <sup>bc</sup> | 5.33±<br>0.12 <sup>ab</sup> | 71.53<br>±1.33 <sup>d</sup> | 396.67<br>±5.77 <sup>a</sup> | 126.67±<br>5.77 <sup>a</sup>   | 0             | 34±3.4<br>6 <sup>ab</sup>    | 34±3.4<br>6 <sup>ab</sup>    | 4.71±0.<br>25 <sup>d</sup> | 3.38±0<br>.33 <sup>b</sup> | 17±1.7<br>3 <sup>ab</sup>    | 1.28±<br>0.24 <sup>a</sup> | 1.37±<br>0.12 <sup>b</sup>  |
| <b>K5</b>      | 20.67<br>±0.58 <sup>a</sup> | 8.07±<br>0.06 <sup>a</sup> | 0.42±<br>0.02 <sup>b</sup> | 212.67<br>±2.31 <sup>c</sup> | 332.30<br>±3.61 <sup>c</sup>  | 5.4±0<br>.17 <sup>b</sup>   | 64.33<br>±3.75 <sup>c</sup> | 436.67<br>±5.77 <sup>b</sup> | 173.33±<br>5.77 <sup>d</sup>   | 0             | 43.33±<br>5.77 <sup>bc</sup> | 43.33±<br>5.77 <sup>bc</sup> | 5.13±0.<br>12 <sup>d</sup> | 2.62±0<br>.54 <sup>a</sup> | 16.33±<br>1.15 <sup>ab</sup> | 1.29±<br>0.01 <sup>a</sup> | 1.33±<br>0.14 <sup>ab</sup> |
| <b>K6</b>      | 20.67<br>±0.58 <sup>a</sup> | 8.07±<br>0.06 <sup>a</sup> | 0.41±<br>0.01 <sup>b</sup> | 206.67<br>±5.77 <sup>c</sup> | 322.92<br>±9.02 <sup>c</sup>  | 3.57±<br>0.06 <sup>a</sup>  | 91.67<br>±1.27 <sup>c</sup> | 543.33<br>±5.77 <sup>d</sup> | 163.33±<br>11.55 <sup>cd</sup> | 0             | 52.67±<br>2.31 <sup>c</sup>  | 52.67±<br>2.31 <sup>c</sup>  | 3.7±0.1<br>7 <sup>b</sup>  | 5.59±0<br>.10 <sup>c</sup> | 15.67±<br>0.58 <sup>a</sup>  | 1.43±<br>0.06 <sup>a</sup> | 1.36±<br>0.02 <sup>b</sup>  |
| <b>Average</b> | 20.67                       | 8.34                       | 0.42                       | 200.39                       | 313.11                        | 5.2                         | 63.68                       | 488.33                       | 152.89                         | 0             | 41.39                        | 41.39                        | 4.62                       | 3.64                       | 16.91                        | 1.47                       | 1.29                        |

Note: Different alphabetical letters as superscript specify significant differences among different sites of the selected lakes at p<0.05.

**Supplementary Table 7: Physicochemical analysis of water quality of the lake during monsoon season (October, 2020)**

| Parameter      | Temp (°C)                   | Ph                         | Secchi Depth (m)           | TDS (ppm)                     | EC (µS/cm)                    | DO (mg/l)                    | BOD (mg/l)                     | TSS (mg/l)                     | Hardness (mg/l)               | Phenol (mg/l) | Meth Alk (mg/l)               | Total Alk (mg/l)             | Nitrate (mg/l)               | Nitrite (mg/l)             | TP (mg/l)                   | Chl a (µg/l)                | Chl b (µg/l)               |
|----------------|-----------------------------|----------------------------|----------------------------|-------------------------------|-------------------------------|------------------------------|--------------------------------|--------------------------------|-------------------------------|---------------|-------------------------------|------------------------------|------------------------------|----------------------------|-----------------------------|-----------------------------|----------------------------|
| <b>K2</b>      | 28.67<br>±1.15 <sup>a</sup> | 8.93±<br>0.06 <sup>c</sup> | 0.21±<br>0.02 <sup>a</sup> | 206.67<br>±5.77 <sup>b</sup>  | 322.92<br>±9.02 <sup>b</sup>  | 5.17±<br>0.29 <sup>abc</sup> | 80.2±1<br>7.23 <sup>c</sup>    | 510±10 <sup>b</sup>            | 134±1.<br>73 <sup>ab</sup>    | 0             | 270.73<br>±3.95 <sup>c</sup>  | 270.73<br>±3.95 <sup>d</sup> | 3.43±0.<br>21 <sup>a</sup>   | 7.7±0.<br>17 <sup>c</sup>  | 9.33±<br>0.58 <sup>b</sup>  | 1.47±<br>0.08 <sup>b</sup>  | 1.41±<br>0.02 <sup>b</sup> |
| <b>K3</b>      | 28±1.<br>73 <sup>a</sup>    | 8.63±<br>0.12 <sup>c</sup> | 0.24±<br>0.02 <sup>a</sup> | 193.33<br>±5.77 <sup>ab</sup> | 302.09<br>±9.02 <sup>ab</sup> | 6.27±<br>0.25 <sup>cd</sup>  | 37.2±6.<br>75 <sup>a</sup>     | 473.33±<br>11.55 <sup>a</sup>  | 116.67<br>±5.77 <sup>a</sup>  | 0             | 231.9±<br>2.71 <sup>ab</sup>  | 231.9±<br>2.71 <sup>b</sup>  | 4.03±0.<br>15 <sup>bc</sup>  | 6.83±0<br>.15 <sup>b</sup> | 9.9±0.<br>1 <sup>bc</sup>   | 0.51±<br>0.08 <sup>a</sup>  | 0.67±<br>0.03 <sup>a</sup> |
| <b>K4</b>      | 29.33<br>±0.58 <sup>a</sup> | 8.93±<br>0.06 <sup>c</sup> | 0.29±<br>0.01 <sup>a</sup> | 193.33<br>±5.77 <sup>ab</sup> | 302.09<br>±9.02 <sup>ab</sup> | 6.97±<br>0.06 <sup>d</sup>   | 51.38±<br>15.63 <sup>abc</sup> | 493.33±<br>11.55 <sup>ab</sup> | 123.33<br>±2.89 <sup>a</sup>  | 0             | 248.5±<br>3.04 <sup>bc</sup>  | 248.5±<br>3.04 <sup>c</sup>  | 4.67±0.<br>29 <sup>d</sup>   | 5.87±0<br>.12 <sup>a</sup> | 6.93±<br>0.06 <sup>a</sup>  | 1.67±<br>0.20 <sup>bc</sup> | 1.90±<br>0.01 <sup>c</sup> |
| <b>K5</b>      | 28±1.<br>73 <sup>a</sup>    | 8.2±0<br>.17 <sup>b</sup>  | 0.27±<br>0.12 <sup>a</sup> | 203.33<br>±5.77 <sup>ab</sup> | 317.71<br>±9.02 <sup>ab</sup> | 5±0.5 <sup>a</sup><br>b      | 69.22±<br>2.22 <sup>bc</sup>   | 513.33±<br>11.55 <sup>b</sup>  | 136.67<br>±9.43 <sup>ab</sup> | 0             | 231±0.<br>87 <sup>ab</sup>    | 231±0.<br>87 <sup>b</sup>    | 3.73±0.<br>23 <sup>ab</sup>  | 9.87±0<br>.12 <sup>d</sup> | 8.93±<br>0.06 <sup>ab</sup> | 1.68±<br>0.06 <sup>bc</sup> | 1.97±<br>0.02 <sup>c</sup> |
| <b>K6</b>      | 27.67<br>±1.17 <sup>a</sup> | 7.7±0<br>.17 <sup>a</sup>  | 0.25±<br>0.01 <sup>a</sup> | 180±17<br>.32 <sup>a</sup>    | 281.25<br>±27.06 <sup>a</sup> | 5.53±<br>0.76 <sup>bc</sup>  | 27.31±<br>5.21 <sup>a</sup>    | 490±10 <sup>a</sup><br>b       | 168±5.<br>29 <sup>c</sup>     | 0             | 214.27<br>±16.42 <sup>a</sup> | 203.47<br>±4.62 <sup>a</sup> | 3.97±0.<br>21 <sup>abc</sup> | 6.83±0<br>.17 <sup>b</sup> | 12±1.<br>63 <sup>c</sup>    | 2.07±<br>0.25 <sup>c</sup>  | 1.82±<br>0.11 <sup>c</sup> |
| <b>Average</b> | 28.28                       | 8.55                       | 0.25                       | 196.67                        | 307.3                         | 5.55                         | 51.1                           | 497.22                         | 137.56                        | 0             | 238.98                        | 237.18                       | 4.04                         | 7.26                       | 9.68                        | 1.45                        | 1.5                        |

Note: Different alphabetical letters as superscript specify significant differences among different sites of the selected lakes at p<0.05

**Supplementary Table 8:** Trophic State Index of lake during first year of the sampling

| Phase                              | First Year of Sampling                                                              |              |      |              |       |              |                                                                                    |              |      |              |       |              |                                                                                     |              |       |              |       |              |
|------------------------------------|-------------------------------------------------------------------------------------|--------------|------|--------------|-------|--------------|------------------------------------------------------------------------------------|--------------|------|--------------|-------|--------------|-------------------------------------------------------------------------------------|--------------|-------|--------------|-------|--------------|
| Seasons                            | Monsoon (Oct-2018)                                                                  |              |      |              |       |              | Winter (Jan-2019)                                                                  |              |      |              |       |              | Summer (May-2019)                                                                   |              |       |              |       |              |
| Site                               | SD                                                                                  | TSI (SD)     | TP   | TSI (TP)     | Chl-a | TSI (Chl-a)  | SD                                                                                 | TSI (SD)     | TP   | TSI (TP)     | Chl-a | TSI (Chl-a)  | SD                                                                                  | TSI (SD)     | TP    | TSI (TP)     | Chl-a | TSI (Chl-a)  |
| K1                                 | 0.38                                                                                | 73.94        | 20.2 | 47.49        | 0.13  | 10.59        | 0.38                                                                               | 73.94        | 2.45 | 27.21        | 0.55  | 24.74        | 0.45                                                                                | 71.51        | 3.73  | 23.02        | 0.37  | 20.85        |
| K2                                 | 0.78                                                                                | 63.58        | 4.3  | 25.18        | 0.08  | 5.82         | 0.37                                                                               | 74.33        | 3.8  | 23.40        | 1.25  | 32.79        | 0.44                                                                                | 71.83        | 12.72 | 40.82        | 0.55  | 24.74        |
| K3                                 | 0.40                                                                                | 73.20        | 4.1  | 24.50        | 0.16  | 12.62        | 0.40                                                                               | 73.20        | 4.66 | 31.38        | 0.32  | 19.42        | 0.5                                                                                 | 69.99        | 7.6   | 33.40        | 0.45  | 22.77        |
| K4                                 | 0.42                                                                                | 72.50        | 4.52 | 25.90        | 5.03  | 46.45        | 0.38                                                                               | 73.94        | 2.5  | 17.36        | 0.22  | 15.75        | 0.55                                                                                | 68.61        | 4.92  | 27.13        | 0.3   | 18.79        |
| K5                                 | 0.64                                                                                | 66.43        | 4.02 | 24.21        | 6.08  | 48.31        | 0.38                                                                               | 73.94        | 3.77 | 29.84        | 1.22  | 32.55        | 0.69                                                                                | 65.35        | 6.88  | 31.96        | 0.43  | 22.32        |
| K6                                 | 0.59                                                                                | 67.60        | 3.72 | 23.09        | 4.46  | 45.27        | 0.40                                                                               | 73.20        | 3.01 | 20.04        | 0.44  | 22.55        | 0.70                                                                                | 65.14        | 6.59  | 31.34        | 0.66  | 26.52        |
| <b>Average</b>                     |                                                                                     | <b>69.54</b> |      | <b>28.40</b> |       | <b>28.17</b> |                                                                                    | <b>73.76</b> |      | <b>24.87</b> |       | <b>24.63</b> |                                                                                     | <b>68.74</b> |       | <b>31.28</b> |       | <b>22.67</b> |
| <b>Carlson Trophic State index</b> | [TSI (SD) +TSI (TP)+ TSI (Chl-a)]/3<br>[69.54+28.40+28.17]/3<br>42.04 (Mesotrophic) |              |      |              |       |              | [TSI (SD)+TSI (TP)+ TSI (Chl-a)]/3<br>[73.76+24.87+24.63]/3<br>41.09 (Mesotrophic) |              |      |              |       |              | [TSI (SD) +TSI (TP)+ TSI (Chl-a)]/3<br>[68.74+31.28+22.67]/3<br>40.90 (Mesotrophic) |              |       |              |       |              |

**Supplementary Table 9:** Trophic State Index of lake during second year of the sampling

| Phase                              | Second year of the sampling                                                                                   |          |       |         |       |            |                                                                                                               |         |       |         |       |            |                                                                                                               |         |       |         |       |            |
|------------------------------------|---------------------------------------------------------------------------------------------------------------|----------|-------|---------|-------|------------|---------------------------------------------------------------------------------------------------------------|---------|-------|---------|-------|------------|---------------------------------------------------------------------------------------------------------------|---------|-------|---------|-------|------------|
| Seasons                            | Monsoon (October 2019)                                                                                        |          |       |         |       |            | Winter (January,2020)                                                                                         |         |       |         |       |            | Monsoon (October, 2020)                                                                                       |         |       |         |       |            |
| Parameter                          | SD                                                                                                            | TSI (SD) | TP    | TSI(TP) | Chl a | TSI(Chl a) | SD                                                                                                            | TSI(SD) | TP    | TSI(TP) | Chl a | TSI(Chl a) | SD                                                                                                            | TSI(SD) | TP    | TSI(TP) | Chl a | TSI(Chl a) |
| <b>K1</b>                          | 0.23                                                                                                          | 76.42    | 7.68  | 33.55   | 1.03  | 30.89      | 0.54                                                                                                          | 68.88   | 16    | 44.1    | 1.25  | 32.79      | 0.22                                                                                                          | 81.82   | 10.97 | 38.69   | 1.32  | 33.32      |
| <b>K2</b>                          | 0.28                                                                                                          | 78.34    | 11.07 | 38.82   | 0.39  | 21.26      | 0.37                                                                                                          | 74.33   | 19.47 | 46.93   | 2.17  | 38.2       | 0.21                                                                                                          | 82.49   | 9.33  | 36.35   | 1.47  | 34.38      |
| <b>K3</b>                          | 0.28                                                                                                          | 78.34    | 9.32  | 36.34   | 1.39  | 33.83      | 0.37                                                                                                          | 74.33   | 17    | 44.98   | 1.37  | 33.69      | 0.24                                                                                                          | 80.56   | 9.9   | 37.21   | 0.51  | 23.99      |
| <b>K4</b>                          | 0.27                                                                                                          | 78.87    | 23.63 | 49.75   | 0.33  | 19.72      | 0.41                                                                                                          | 72.85   | 17    | 44.98   | 1.28  | 33.02      | 0.29                                                                                                          | 77.84   | 6.93  | 32.07   | 1.67  | 35.77      |
| <b>K5</b>                          | 0.22                                                                                                          | 81.82    | 4.67  | 26.37   | 0.41  | 21.85      | 0.42                                                                                                          | 72.5    | 16.33 | 44.4    | 1.29  | 33.1       | 0.27                                                                                                          | 78.87   | 8.93  | 35.72   | 1.68  | 35.69      |
| <b>K6</b>                          | 0.29                                                                                                          | 77.84    | 1.81  | 12.71   | 0.48  | 23.4       | 0.41                                                                                                          | 72.85   | 15.67 | 43.8    | 1.43  | 34.11      | 0.25                                                                                                          | 79.98   | 12    | 39.98   | 2.07  | 37.74      |
| <b>Average</b>                     |                                                                                                               | 78.61    |       | 32.92   |       | 25.16      |                                                                                                               | 72.63   |       | 44.87   |       | 34.15      |                                                                                                               | 80.26   |       | 36.67   |       | 33.48      |
| <b>Carlson Trophic State Index</b> | $\frac{[TSI (SD) + TSI (TP) + TSI (Chl-a)]}{3}$ $\frac{[78.61+32.92+25.16]}{3}$ $45.56 \text{ (Mesotrophic)}$ |          |       |         |       |            | $\frac{[TSI (SD) + TSI (TP) + TSI (Chl-a)]}{3}$ $\frac{[72.63+44.87+34.15]}{3}$ $50.55 \text{ (Mesotrophic)}$ |         |       |         |       |            | $\frac{[TSI (SD) + TSI (TP) + TSI (Chl-a)]}{3}$ $\frac{[80.26+36.67+33.48]}{3}$ $50.14 \text{ (Mesotrophic)}$ |         |       |         |       |            |



**Supplementary Table 10:** Diversity, abundance and distribution of the algal species in the selected three seasons of the Kathauta lake

| S. No                                        | Floristic list of algae                        | First year of Sampling |                   |                   | Second Year of Sampling |                                |                                 |
|----------------------------------------------|------------------------------------------------|------------------------|-------------------|-------------------|-------------------------|--------------------------------|---------------------------------|
|                                              |                                                | Monsoon (Oct-2018)     | Winter (Jan-2019) | Summer (May-2019) | Monsoon (Oct-2019)      | Winter (Jan-2020 Pre-Lockdown) | Monsoon(Oct-2020 Post-Lockdown) |
| <b>Class: Trebouxiophyceae</b>               |                                                |                        |                   |                   |                         |                                |                                 |
| <b>Order: Chlorellales</b>                   |                                                |                        |                   |                   |                         |                                |                                 |
| <b>Family: Chlorellaceae</b>                 |                                                |                        |                   |                   |                         |                                |                                 |
| 1                                            | <i>Chlorella vulgaris</i> <u>M. Beijerinck</u> | +                      | +                 | ++                | +++                     | ++                             | +++                             |
| 2                                            | <i>Micractinium fresenius</i>                  | +                      | +                 | +                 | +                       | ++                             | -                               |
| 3                                            | <i>Micractinium pussillum</i>                  | -                      | -                 | -                 | +                       | ++                             | -                               |
| 4                                            | <i>Dictyosphaerium</i> sp. Nageli, 1849        | +                      | +                 | +                 | +                       | +                              | -                               |
| 5                                            | <i>Actinastrum hantzschii</i>                  | +                      | ++                | +++               | +++                     | ++                             | ++                              |
| <b>Family: Crucigenia (Trebouxiophyceae)</b> |                                                |                        |                   |                   |                         |                                |                                 |
| 6                                            | <i>Crucigenia quadrata</i>                     | -                      | -                 | -                 | +                       | ++                             | ++                              |
| <b>Family: Closteriopsis (Chlorellaceae)</b> |                                                |                        |                   |                   |                         |                                |                                 |
| 7                                            | <i>Closteriopsis longissimi</i>                | -                      | -                 | -                 | ++                      | ++                             | ++                              |
| <b>Class: Chlorophyceae</b>                  |                                                |                        |                   |                   |                         |                                |                                 |
| <b>Order: Chlamydomonadales</b>              |                                                |                        |                   |                   |                         |                                |                                 |
| <b>Family: Chlamydomonadaceae</b>            |                                                |                        |                   |                   |                         |                                |                                 |
| 8                                            | <i>Chlamydomonas</i> sp.                       | +                      | +                 | +                 | -                       | +                              | ++                              |
| <b>Family: Volvocaceae</b>                   |                                                |                        |                   |                   |                         |                                |                                 |
| 9                                            | <i>Pandorina mourm</i>                         | +                      | +                 | +                 | +                       | -                              | -                               |
| 10                                           | <i>Pandorina</i> sp.                           | -                      | +                 | +                 | -                       | -                              | -                               |
| <b>Class: Chlorophyceae</b>                  |                                                |                        |                   |                   |                         |                                |                                 |
| <b>Order: Sphaeropleales</b>                 |                                                |                        |                   |                   |                         |                                |                                 |
| <b>Family: Hydrodictyaceae</b>               |                                                |                        |                   |                   |                         |                                |                                 |
| 11                                           | <i>Pediastrum duplex</i>                       | +                      | +                 | ++                | -                       | -                              | -                               |
| 12                                           | <i>Pediastrum boryanum</i>                     | -                      | -                 | +                 | -                       | -                              | -                               |
| <b>Family: Scenedesmaceae</b>                |                                                |                        |                   |                   |                         |                                |                                 |
| 13                                           | <i>Scenedesmus quadricauda</i>                 | ++                     | ++                | ++                | ++                      | ++                             | ++                              |
| 14                                           | <i>Scenedesmus dimorphus</i>                   | -                      | +                 | ++                | +                       | ++                             | ++                              |
| 15                                           | <i>Scenedesmus opoliensis</i>                  | -                      | -                 | +                 | -                       | -                              | -                               |

|                                           |                                       |    |    |    |     |    |    |
|-------------------------------------------|---------------------------------------|----|----|----|-----|----|----|
| 16                                        | <i>Scenedesmus pectinatus</i>         | -  | -  | -  | ++  | ++ | ++ |
| 17                                        | <i>Coelastrum microsporum</i>         | +  | +  | +  | +   | +  | +  |
| 18                                        | <i>Coelastrum astroideum</i>          | -  | +  | +  | -   | -  | -  |
| 19                                        | <i>Coelastrum sphaerium</i> Nageli    | -  | +  | ++ | +   | -  | ++ |
| 20                                        | <i>Coelastrum</i> sp                  | -  | -  | -  | +++ | -  | -  |
| 21                                        | <i>Actinastrum</i> sp                 | -  | -- | -  | ++  | ++ | ++ |
| <b>Family: Selenastraceae</b>             |                                       |    |    |    |     |    |    |
| 22                                        | <i>Ankistrodesmus falcatus</i>        | -  | -  | +  | -   | -  | -  |
| 23                                        | <i>Golenkiniopsis</i> sp.             | +  | +  | ++ | -   | -  | -  |
| 24                                        | <i>Ankistrodesmus spiralis</i>        | +  | +  | ++ | -   | -  | -  |
| 25                                        | <i>Monoraphidium circinale</i>        | -  | +  | ++ | -   | -  | -  |
| <b>Family: Schroederiaceae</b>            |                                       |    |    |    |     |    |    |
| 26                                        | <i>Schroederia robusta</i>            | -  | +  | ++ | -   | -  | -  |
| <b>Family: Chaetophoraceae</b>            |                                       |    |    |    |     |    |    |
| 27                                        | <i>Stigeoclonium tenue</i>            | -  | -  | -  | -   | ++ | -  |
| <b>Family: Oocystacea</b>                 |                                       |    |    |    |     |    |    |
| 28                                        | <i>Oocystishetero mucosa</i>          | -  | -  | -  | ++  | ++ | ++ |
| <b>Family: Schroederiaceae</b>            |                                       |    |    |    |     |    |    |
| 29                                        | <i>Schroederia setigera</i>           | -  | -  | -  | ++  | ++ | ++ |
| <b>Family: Sphaerocystidaceae</b>         |                                       |    |    |    |     |    |    |
| 30                                        | <i>Sphaerocystis chroeteri</i> Chodat | -  | -  | -  | ++  | ++ | ++ |
| Total species recorded (Chlorophyceae)    |                                       | 11 | 17 | 20 | 18  | 17 | 14 |
| <b>Class: Zygnematophyceae</b>            |                                       |    |    |    |     |    |    |
| <b>Order: Desmiales</b>                   |                                       |    |    |    |     |    |    |
| <b>Family: Desmidiaceae</b>               |                                       |    |    |    |     |    |    |
| 31                                        | <i>Cosmarium angulosum</i>            | -  | -  | +  | -   | -  | -  |
| 32                                        | <i>Staurastrum</i> sp.                | -  | -  | -  | +   | -  | -  |
| Total species recorded (Zygnematophyceae) |                                       | 0  | 0  | 1  | 1   | 0  | 0  |
| <b>Class: Cyanophyceae</b>                |                                       |    |    |    |     |    |    |
| <b>Order: Chroococcales</b>               |                                       |    |    |    |     |    |    |
| <b>Family: Microcystaceae</b>             |                                       |    |    |    |     |    |    |
| 33                                        | <i>Microcystis aeruginosa</i>         | -  | -  | ++ | -   | -  | -  |
| <b>Order: Synechococcales</b>             |                                       |    |    |    |     |    |    |

|                                       |                                    |          |          |          |          |          |          |
|---------------------------------------|------------------------------------|----------|----------|----------|----------|----------|----------|
| <b>Family: Merismopediaceae</b>       |                                    |          |          |          |          |          |          |
| 34                                    | <i>Merismopedia glauca</i>         | +        | +        | ++       | ++       | +++      | -        |
| 35                                    | <i>Merismopedia</i> sp.            | +++      | +++      | +++      | +++      | +++      | ++       |
| <b>Family: Pseudanabaenaceae</b>      |                                    |          |          |          |          |          |          |
| 36                                    | <i>Limnothrix</i> sp.              | +++      | +++      | +++      | ++       | +++      | ++       |
| <b>Order: Oscillatoriales</b>         |                                    |          |          |          |          |          |          |
| <b>Family: Microcoleaceae</b>         |                                    |          |          |          |          |          |          |
| 37                                    | <i>Planktothrix peronata</i>       | -        | +        | ++       | -        | -        | -        |
| <b>Family: Oscillatoriaceae</b>       |                                    |          |          |          |          |          |          |
| 38                                    | <i>Oscillatoria</i> sp.            | ++       | ++       | ++       | ++       | ++       | ++       |
| Total species recorded (Cyanophyceae) |                                    | <b>4</b> | <b>5</b> | <b>6</b> | <b>4</b> | <b>4</b> | <b>3</b> |
| <b>Class: Mediophyceae</b>            |                                    |          |          |          |          |          |          |
| <b>Order: Thalassiosirales</b>        |                                    |          |          |          |          |          |          |
| <b>Family: Thalassiosiraceae</b>      |                                    |          |          |          |          |          |          |
| 39                                    | <i>Thalassiosira weissflogii</i>   | +++      | -        | +++      | -        | -        | -        |
| <b>Order: Stephanodiscales</b>        |                                    |          |          |          |          |          |          |
| <b>Family: Stephanodiscaceae</b>      |                                    |          |          |          |          |          |          |
| 40                                    | <i>Stephanodiscus gas sizensis</i> | +++      | +++      | +++      | -        | -        | -        |
| 41                                    | <i>Cyclotella stelligera</i>       | +++      | +++      | +++      | +        | ++       | ++       |
| 42                                    | <i>Cyclotella meneghiniana</i>     | ++       | ++       | +++      | +        | ++       | -        |
| 43                                    | <i>Cyclotella</i> sp.              | ++       | ++       | +++      | -        | ++       | +        |
| <b>Class: Coscinodiscophyceae</b>     |                                    |          |          |          |          |          |          |
| <b>Order: Melosirales</b>             |                                    |          |          |          |          |          |          |
| <b>Family: Melosiraceae</b>           |                                    |          |          |          |          |          |          |
| 44                                    | <i>Melosirasp C.A Agardh</i>       | +++      | +++      | +++      | +++      | +++      | +++      |
| <b>Class: Bacillariophyceae</b>       |                                    |          |          |          |          |          |          |
| <b>Order: Bacillariales</b>           |                                    |          |          |          |          |          |          |
| <b>Family: Bacillariaceae</b>         |                                    |          |          |          |          |          |          |
| 45                                    | <i>Nitzschia</i> sp.               | +++      | +++      | +++      | ++       | ++       | ++       |
| <b>Class: Bacillariophyceae</b>       |                                    |          |          |          |          |          |          |
| <b>Order: Naviculales</b>             |                                    |          |          |          |          |          |          |
| <b>Family: Naviculaceae</b>           |                                    |          |          |          |          |          |          |

|                                            |                            |           |           |           |          |          |          |
|--------------------------------------------|----------------------------|-----------|-----------|-----------|----------|----------|----------|
| 46                                         | <i>Navicula sp</i>         | +++       | +++       | +++       | ++       | ++       | ++       |
| 47                                         | <i>Caloneis sp</i>         | -         | -         | -         | +        | +++      | ++       |
| <b>Class: Bacillariophyceae</b>            |                            |           |           |           |          |          |          |
| <b>Order: Thalassiophysales</b>            |                            |           |           |           |          |          |          |
| <b>Family: Catenulaceae</b>                |                            |           |           |           |          |          |          |
| 48                                         | <i>Amphora ovalis</i>      | ++        | ++        | ++        | -        | -        | -        |
| <b>Class: Bacillariophyceae</b>            |                            |           |           |           |          |          |          |
| <b>Order: Cymbellales</b>                  |                            |           |           |           |          |          |          |
| <b>Family: Gomphonemataceae</b>            |                            |           |           |           |          |          |          |
| 49                                         | <i>Gomphonema sp.</i>      | ++        | ++        | +++       | -        | ++       | +        |
| <b>Class: Bacillariophyceae</b>            |                            |           |           |           |          |          |          |
| <b>Order: Fragilariales</b>                |                            |           |           |           |          |          |          |
| <b>Family: Fragilariaceae</b>              |                            |           |           |           |          |          |          |
| 50                                         | <i>Synedra ulna</i>        | +         | +         | ++        | -        | +        | -        |
| Total species recorded (Bacillariophyceae) |                            | <b>11</b> | <b>10</b> | <b>11</b> | <b>6</b> | <b>9</b> | <b>7</b> |
| <b>Class: Euglenophyceae</b>               |                            |           |           |           |          |          |          |
| <b>Order: Euglenida</b>                    |                            |           |           |           |          |          |          |
| <b>Family: Phacaceae</b>                   |                            |           |           |           |          |          |          |
| 51                                         | <i>Phacustortus</i>        | +         | +++       | ++        | -        | -        | -        |
| 52                                         | <i>Phacuscrassus</i>       | -         | ++        | +++       | ++       | +++      | -        |
| 53                                         | <i>Phacus orbicularis</i>  | -         | +         | +++       | ++       | +++      | +++      |
| 54                                         | <i>Phacus pleuronectis</i> | -         | -         | -         | ++       | +++      | +++      |
| <b>Family: Euglenidae</b>                  |                            |           |           |           |          |          |          |
| 55                                         | <i>Euglena acus</i>        | ++        | ++        | ++        | -        | -        | -        |
| 56                                         | <i>Euglena viridis</i>     | +++       | +++       | ++        | +++      | +++      | +++      |
| 57                                         | <i>Euglena srinagari</i>   | +++       | +++       | ++        | -        | -        | -        |
| 58                                         | <i>Euglena sp.</i>         | +++       | +++       | ++        | --       | -        | -        |
| 59                                         | <i>Euglena gracilis</i>    | -         | -         | -         | +++      | +++      | +++      |
| 60                                         | <i>Euglena caudata</i>     | -         | -         | -         | +++      | +++      | +++      |
| 61                                         | <i>Euglena granulate</i>   | -         | -         | -         | +++      | +++      | +++      |
| Total species recorded (Euglenophyceae)    |                            | <b>5</b>  | <b>7</b>  | <b>7</b>  | <b>7</b> | <b>7</b> | <b>6</b> |

Note- +++: Dominant; ++: Common; +: Rare; -: Absent

**Supplementary Table 11:** Palmer diversity indices for the algal species reported in the selected Kathuta lake

| S. No                                        | Floristic list of algae                        | First Year of Sampling |                   |                   | Second Year of Sampling |                                 |                                  |
|----------------------------------------------|------------------------------------------------|------------------------|-------------------|-------------------|-------------------------|---------------------------------|----------------------------------|
|                                              |                                                | Monsoon (Oct-2018)     | Winter (Jan-2019) | Summer (May-2019) | Monsoon (Oct-2019)      | Winter ( Jan-2020 Pre-Lockdown) | Monsoon( Oct-2020 Post-Lockdown) |
| <b>Class: Trebouxiophyceae</b>               |                                                |                        |                   |                   |                         |                                 |                                  |
| <b>Order: Chlorellales</b>                   |                                                |                        |                   |                   |                         |                                 |                                  |
| <b>Family: Chlorellaceae</b>                 |                                                |                        |                   |                   |                         |                                 |                                  |
| 1                                            | <i>Chlorella vulgaris</i> <u>M. Beijerinck</u> | +2                     | +2                | ++2               | +++2                    | ++2                             | +++2                             |
| 2                                            | <i>Micractinium fresenius</i>                  | +1                     | +1                | +1                | +1                      | ++1                             | -0                               |
| 3                                            | <i>Micractinium pussillum</i>                  | -0                     | -0                | -0                | +1                      | ++1                             | -0                               |
| 4                                            | <i>Dictyosphaerium</i> sp. Nageli,1849         | +                      | +                 | +                 | +                       | +                               | -                                |
| 5                                            | <i>Actinastrumhantzschii</i>                   | +                      | ++                | +++               | +++                     | ++                              | ++                               |
| <b>Family: Crucigenia (Trebouxiophyceae)</b> |                                                |                        |                   |                   |                         |                                 |                                  |
| 6                                            | <i>Crucigenia quadrata</i>                     | -                      | -                 | -                 | +                       | ++                              | ++                               |
| <b>Family: Closteriopsis (Chlorellaceae)</b> |                                                |                        |                   |                   |                         |                                 |                                  |
| 7                                            | <i>Closteriopsis longissima</i>                | -                      | -                 | -                 | ++                      | ++                              | ++                               |
| <b>Class: Chlorophyceae</b>                  |                                                |                        |                   |                   |                         |                                 |                                  |
| <b>Order: Chlamydomonadales</b>              |                                                |                        |                   |                   |                         |                                 |                                  |
| <b>Family: Chlamydomonadaceae</b>            |                                                |                        |                   |                   |                         |                                 |                                  |
| 8                                            | <i>Chlamydomonas</i> sp.                       | +4                     | +4                | +4                | -                       | +4                              | ++4                              |
| <b>Family: Volvocaceae</b>                   |                                                |                        |                   |                   |                         |                                 |                                  |
| 9                                            | <i>Pandorina mourm</i>                         | +3                     | +3                | +3                | +3                      | -                               | -                                |
| 10                                           | <i>Pandorina</i> sp.                           | -                      | +1                | +1                | -                       | -                               | -                                |
| <b>Class: Chlorophyceae</b>                  |                                                |                        |                   |                   |                         |                                 |                                  |
| <b>Order: Sphaeropleales</b>                 |                                                |                        |                   |                   |                         |                                 |                                  |
| <b>Family: Hydrodictyaceae</b>               |                                                |                        |                   |                   |                         |                                 |                                  |
| 11                                           | <i>Pediastrum duplex</i>                       | +3                     | +3                | ++3               | -                       | -                               | -                                |
| 12                                           | <i>Pediastrum boryanum</i>                     | -                      | -                 | +3                | -                       | -                               | -                                |
| <b>Family: Scenedesmaceae</b>                |                                                |                        |                   |                   |                         |                                 |                                  |
| 13                                           | <i>Scenedesmus quadricauda</i>                 | ++4                    | ++4               | ++4               | ++4                     | ++4                             | ++4                              |
| 14                                           | <i>Scenedesmus dimorphus</i>                   | -                      | +                 | ++4               | +4                      | ++4                             | ++4                              |

|                                                  |                                                        |           |           |           |           |           |           |
|--------------------------------------------------|--------------------------------------------------------|-----------|-----------|-----------|-----------|-----------|-----------|
| 15                                               | <i>Scenedesmus opoliensis</i>                          | -         | -         | +4        | -         | -         | -         |
| 16                                               | <i>Scenedesmus pectinatus</i>                          | -         | -         | -         | ++4       | ++4       | ++4       |
| 17                                               | <i>Coelastrum microsporum</i>                          | +         | +         | +         | +         | +         | +         |
| 18                                               | <i>Coelastrum astroideum</i>                           | -         | +         | +         | -         | -         | -         |
| 19                                               | <i>Coelastrum sphaerium</i><br><i>Nageli, 1849</i>     | -         | +         | ++        | +         | -         | ++        |
| 20                                               | <i>Coelastrum sp</i>                                   | -         | -         | -         | +++       | -         | -         |
| 21                                               | <i>Actinastrum sp</i>                                  | -         | --        | -         | ++        | ++        | ++        |
| <b>Family: Selenastraceae</b>                    |                                                        |           |           |           |           |           |           |
| 22                                               | <i>Ankistrodesmus falcatus</i>                         | -         | -         | +3        | -         | -         | -         |
| 23                                               | <i>Golenkiniopsis sp.</i>                              | +         | +         | ++        | -         | -         | -         |
| 24                                               | <i>Ankistrodesmus spiralis</i>                         | +         | +         | ++        | -         | -         | -         |
| 25                                               | <i>Monoraphidium circinale</i>                         | -         | +         | ++        | -         | -         | -         |
| <b>Family: Schroederiaceae</b>                   |                                                        |           |           |           |           |           |           |
| 26                                               | <i>Schroederia robusta</i>                             | -         | +         | ++        | -         | -         | -         |
| <b>Family: Chaetophoraceae</b>                   |                                                        |           |           |           |           |           |           |
| 27                                               | <i>Stigeoclonium tenue</i>                             | -         | -         | -         | -         | ++3       | -         |
| <b>Family: Oocystaceae</b>                       |                                                        |           |           |           |           |           |           |
| 28                                               | <i>Oocystishetero mucosa</i>                           | -         | -         | -         | ++        | ++        | ++        |
| <b>Family: Schroederiaceae</b>                   |                                                        |           |           |           |           |           |           |
| 29                                               | <i>Schroederiasetigera</i>                             | -         | -         | -         | ++        | ++        | ++        |
| <b>Family- Sphaerocystidaceae</b>                |                                                        |           |           |           |           |           |           |
| 30                                               | <i>Sphaerocystis schroeteri</i><br><i>Chodat, 1897</i> | -         | -         | -         | ++        | ++        | ++        |
| <b>Total species recorded (Chlorophyceae)</b>    |                                                        | <b>11</b> | <b>17</b> | <b>20</b> | <b>18</b> | <b>17</b> | <b>14</b> |
| <b>Class: Zygnematophyceae</b>                   |                                                        |           |           |           |           |           |           |
| <b>Order: Desmidiiales</b>                       |                                                        |           |           |           |           |           |           |
| <b>Family: Desmidiaceae</b>                      |                                                        |           |           |           |           |           |           |
| 31                                               | <i>Cosmarium angulosum</i>                             | -         | -         | +         | -         | -         | -         |
| 32                                               | <i>Staurastrum sp.</i>                                 | -         | -         | -         | +         | -         | -         |
| <b>Total species recorded (Zygnematophyceae)</b> |                                                        | <b>0</b>  | <b>0</b>  | <b>1</b>  | <b>1</b>  | <b>0</b>  | <b>0</b>  |
| <b>Class: Cyanophyceae</b>                       |                                                        |           |           |           |           |           |           |
| <b>Order: Chroococcales</b>                      |                                                        |           |           |           |           |           |           |

|                                              |                                    |          |          |          |          |          |          |
|----------------------------------------------|------------------------------------|----------|----------|----------|----------|----------|----------|
| <b>Family: Microcystaceae</b>                |                                    |          |          |          |          |          |          |
| 33                                           | <i>Microcystis aeruginosa</i>      | -        | -        | ++1      | -        | -        | -        |
| <b>Order: Synechococcales</b>                |                                    |          |          |          |          |          |          |
| <b>Family: Merismopediaceae</b>              |                                    |          |          |          |          |          |          |
| 34                                           | <i>Merismopedia glauca</i>         | +        | +        | ++       | ++       | +++      | -        |
| 35                                           | <i>Merismopedia</i> sp.            | +++      | +++      | +++      | +++      | +++      | ++       |
| <b>Family: Pseudanabaenaceae</b>             |                                    |          |          |          |          |          |          |
| 36                                           | <i>Limnothrix</i>                  | +++      | +++      | +++      | ++       | +++      | ++       |
| <b>Order: Oscillatoriales</b>                |                                    |          |          |          |          |          |          |
| <b>Family: Microcoleaceae</b>                |                                    |          |          |          |          |          |          |
| 37                                           | <i>Planktothrix peronata</i>       | -        | +        | ++       | -        | -        | -        |
| <b>Family: Oscillatoriaceae</b>              |                                    |          |          |          |          |          |          |
| 38                                           | <i>Oscillatoria</i> sp.            | ++5      | ++5      | ++5      | ++5      | ++5      | ++5      |
| <b>Total species recorded (Cyanophyceae)</b> |                                    | <b>4</b> | <b>5</b> | <b>6</b> | <b>4</b> | <b>4</b> | <b>3</b> |
| <b>Class: Mediophyceae</b>                   |                                    |          |          |          |          |          |          |
| <b>Order: Thalassiosirales</b>               |                                    |          |          |          |          |          |          |
| <b>Family: Thalassiosiraceae</b>             |                                    |          |          |          |          |          |          |
| 39                                           | <i>Thalassiosira weissflogii</i>   | +++      | -        | +++      | -        | -        | -        |
| <b>Order: Stephanodiscales</b>               |                                    |          |          |          |          |          |          |
| <b>Family: Stephanodiscaceae</b>             |                                    |          |          |          |          |          |          |
| 40                                           | <i>Stephanodiscus agassizensis</i> | +++      | +++      | +++      | -        | -        | -        |
| 41                                           | <i>Cyclotella stelligera</i>       | +++<br>1 | +++1     | +++1     | +1       | ++1      | ++1      |
| 42                                           | <i>Cyclotella meneghiniana</i>     | ++2      | ++2      | +++2     | +2       | ++2      | -        |
| 43                                           | <i>Cyclotella</i> sp.              | ++1      | ++1      | +++1     | -        | ++1      | +1       |
| <b>Class: Coscinodiscophyceae</b>            |                                    |          |          |          |          |          |          |
| <b>Order: Melosirales</b>                    |                                    |          |          |          |          |          |          |
| <b>Family: Melosiraceae</b>                  |                                    |          |          |          |          |          |          |
| 44                                           | <i>Melosirasp</i> C.A Agardh, 1824 | +++<br>1 | +++1     | +++1     | +++1     | +++1     | +++1     |
| <b>Class: Bacillariophyceae</b>              |                                    |          |          |          |          |          |          |
| <b>Order: Bacillariales</b>                  |                                    |          |          |          |          |          |          |
| <b>Family: Bacillariaceae</b>                |                                    |          |          |          |          |          |          |

|                                                   |                            |           |           |           |          |          |          |
|---------------------------------------------------|----------------------------|-----------|-----------|-----------|----------|----------|----------|
| 45                                                | <i>Nitzschia sp.</i>       | +++<br>3  | +++3      | +++3      | ++3      | ++3      | ++3      |
| <b>Class: Bacillariophyceae</b>                   |                            |           |           |           |          |          |          |
| <b>Order: Naviculales</b>                         |                            |           |           |           |          |          |          |
| <b>Family: Naviculaceae</b>                       |                            |           |           |           |          |          |          |
| 46                                                | <i>Navicula sp.</i>        | +++<br>3  | +++3      | +++3      | ++3      | ++3      | ++3      |
| 47                                                | <i>Caloneis sp.</i>        | -         | -         | -         | +        | +++      | ++       |
| <b>Class: Bacillariophyceae</b>                   |                            |           |           |           |          |          |          |
| <b>Order: Thalassiophysales</b>                   |                            |           |           |           |          |          |          |
| <b>Family: Catenulaceae</b>                       |                            |           |           |           |          |          |          |
| 48                                                | <i>Amphora ovalis</i>      | ++        | ++        | ++        | -        | -        | -        |
| <b>Class: Bacillariophyceae</b>                   |                            |           |           |           |          |          |          |
| <b>Order: Cymbellales</b>                         |                            |           |           |           |          |          |          |
| <b>Family: Gomphonemataceae</b>                   |                            |           |           |           |          |          |          |
| 49                                                | <i>Gomphonema sp.</i>      | +++1      | +++1      | +++1      | -        | +++1     | +        |
| <b>Class: Bacillariophyceae</b>                   |                            |           |           |           |          |          |          |
| <b>Order: Fragilariales</b>                       |                            |           |           |           |          |          |          |
| <b>Family: Fragilariaceae</b>                     |                            |           |           |           |          |          |          |
| 50                                                | <i>Synedra ulna</i>        | +3        | +3        | ++3       | -        | +3       | -        |
| <b>Total species recorded (Bacillariophyceae)</b> |                            | <b>11</b> | <b>10</b> | <b>11</b> | <b>6</b> | <b>9</b> | <b>7</b> |
| <b>Class: Euglenophyceae</b>                      |                            |           |           |           |          |          |          |
| <b>Order: Euglenida</b>                           |                            |           |           |           |          |          |          |
| <b>Family: Phacaceae</b>                          |                            |           |           |           |          |          |          |
| 51                                                | <i>Phacus tortus</i>       | +2        | +++2      | ++2       | -        | -        | -        |
| 52                                                | <i>Phacus crassus</i>      | -         | ++2       | +++2      | ++2      | +++2     | -        |
| 53                                                | <i>Phacus orbicularis</i>  | -         | +2        | +++2      | ++2      | +++2     | +++2     |
| 54                                                | <i>Phacus pleuronectis</i> | -         | -         | -         | ++2      | +++2     | +++2     |
| <b>Family: Euglenidae</b>                         |                            |           |           |           |          |          |          |
| 55                                                | <i>Euglena acus</i>        | +++6      | +++6      | +++6      | -        | -        | -        |
| 56                                                | <i>Euglena viridis</i>     | +++6      | +++6      | +++6      | +++6     | +++6     | +++6     |
| 57                                                | <i>Euglena srinagari</i>   | +++5      | +++5      | +++5      | -        | -        | -        |
| 58                                                | <i>Euglena sp.</i>         | +++5      | +++5      | +++5      | --       | -        | -        |
| 59                                                | <i>Euglena gracilis</i>    | -         | -         | -         | +++1     | +++1     | +++1     |
| 60                                                | <i>Euglena caudata</i>     | -         | -         | -         | +++5     | +++5     | +++5     |
| 61                                                | <i>Euglena granulata</i>   | -         | -         | -         | +++5     | +++5     | +++5     |
| <b>Total species recorded (Euglenaceae)</b>       |                            | <b>5</b>  | <b>7</b>  | <b>7</b>  | <b>7</b> | <b>7</b> | <b>6</b> |



|                    |    |    |    |    |    |    |
|--------------------|----|----|----|----|----|----|
| Palmer Index Total | 61 | 66 | 81 | 57 | 66 | 53 |
|--------------------|----|----|----|----|----|----|

**Supplementary Table 12:** Macrophytes found in the lake in all the three seasons

| S. No | Macrophytes                                  | Family         | Year of Sampling                      |                  |                                                                           | First Year of Sampling |                   |                   | Second Year of sampling |                                |                                  |
|-------|----------------------------------------------|----------------|---------------------------------------|------------------|---------------------------------------------------------------------------|------------------------|-------------------|-------------------|-------------------------|--------------------------------|----------------------------------|
|       |                                              |                | Type of plant                         | Common Name      | Native Range                                                              | Monsoon (Oct-2018)     | Winter (Jan-2019) | Summer (May 2019) | Monsoon (Oct-2019)      | Winter (Jan-2019 pre-lockdown) | Monsoon (Oct-2020 post-lockdown) |
| 1     | <i>Eichhornia crassipes</i> (Mart.)          | Pontederiaceae | Perennial free floating aquatic plant | Water Hyacinth   | South America                                                             | +                      | +                 | +                 | +                       | +                              | +                                |
| 2     | <i>Trapa natans bispinosa</i> (Roxb.) Makino | Lythraceae     | Floating plant                        | Water chestnut   | Taiwan, China, Korea and Japan                                            | +                      | -                 | -                 | -                       | -                              | -                                |
| 3     | <i>Pistia stratiotes</i> L.                  | Araceae        | Free-floating aquatic plant           | Water Lettuce    | Uncertain, probably pantropical, first found from Africa or South America | +                      | +                 | +                 | +                       | +                              | +                                |
| 4     | <i>Azolla pinnata</i> R.Br                   | Salviniaceae   | Floating plant                        | Mosquito fern    | Africa, Asia and parts of Australia                                       | -                      | -                 | -                 | -                       | -                              | -                                |
| 5     | <i>Lemna minor</i> L.                        | Araceae        | Free-floating aquatic plant           | Common duck weed | Africa, Asia, Europe and North America                                    | +                      | +                 | +                 | +                       | +                              | +                                |
| 6     | <i>Lemna gibba</i> L.                        | Araceae        | Free-floating aquatic plant           | Duckweed         | Ireland                                                                   | +                      | +                 | +                 | +                       | +                              | +                                |

|    |                                                |                         |                                   |                          |                                              |   |   |   |   |   |   |
|----|------------------------------------------------|-------------------------|-----------------------------------|--------------------------|----------------------------------------------|---|---|---|---|---|---|
| 7  | <i>Wolffia globosa</i> (Roxb.) Hartog and Plas | <u>Araceae</u>          | Free-floating aquatic plant       | Asian water meal         | Asia                                         | - | + | + | + | + | + |
| 8  | <i>Ipomea hederacea</i>                        | Convolvulaceae          | Semi-aquatic floating plant       | Ivy-leaved morning glory | Tropical parts of America                    | + | - | - | - | - | - |
| 9  | <i>Ipomea aquatica</i> Forssk.                 | Convolvulaceae          | Semi-aquatic floating plant       | Water Morning Glory      | South East Asia                              | + | + | + | - | - | - |
| 10 | <i>Potamogeton crispus</i> L.                  | Potamogetonaceae        | Submerged aquatic perennial plant | Curly leaf pondweed      | Eurasia                                      | + | + | - | - | - | - |
| 11 | <i>Vallisneria spiralis</i> L.                 | Hydrocharitaceae        | Submerged aquatic plant           | Eel grass                | Southern Europe                              | + | + | + | - | - | - |
| 12 | <i>Ceratophyllum demersum</i> L.               | Ceratophyllaceae        | Submerged aquatic plant           | Common hornwort          | All continents except Antarctica             | + | + | + | - | - | - |
| 13 | <i>Hydrilla verticillata</i> (L.f.) Royle      | Hydrocharitaceae        | Submerged perennial aquatic plant | Indian star-vine         | Probably Africa and Europe                   | + | + | + | - | - | - |
| 14 | <i>Elodea canadensis</i>                       | Hydrocharitaceae        | Submerged perennial aquatic plant | American Waterweed       | North America                                | + | + | + | - | - | - |
| 15 | <i>Egeria densa</i>                            | <u>Hydrocharitaceae</u> | Submerged perennial aquatic plant | Brazilian waterweed      | warm temperate South America in southeastern | - | + | + | - | - | - |

|    |                                |              |                                     |                                              |                                                                                                                                                            |   |   |   |   |   |   |
|----|--------------------------------|--------------|-------------------------------------|----------------------------------------------|------------------------------------------------------------------------------------------------------------------------------------------------------------|---|---|---|---|---|---|
|    |                                |              |                                     |                                              | Brazil,<br>Argentina,<br>Chile and<br>Uruguay                                                                                                              |   |   |   |   |   |   |
| 16 | <i>Myriophyllum spicatum</i>   | Haloragaceae | Submerged aquatic plant             | Eurasian watermilfoil or spiked watermilfoil | Europe from Ireland and Portugal to Finland and Bulgaria and in Russia, Ukraine, Siberia, Japan, Turkey, China, India, Australia, Vietnam and the Caucasus | - | + | + | - | + | - |
| 17 | <i>Sagittaria sagittifolia</i> | Alismataceae | Rooted emergent plant               | Arrowhead                                    | Temperate Europe and Asia                                                                                                                                  | + | + | + | - | - | + |
| 18 | <i>Typha latifolia</i> L.      | Typhaceae    | Perennial emergent herbaceous plant | Broad-leaf cattail                           | North and South America, Europe, Eurasia and Africa                                                                                                        | + | + | + | + | + | + |
| 19 | <i>Typha augustifolia</i> L.   | Typhaceae    | Emergent plant                      | Narrow-leaf cattail                          | North America, Europe and Asia                                                                                                                             | + | + | + | + | + | + |
| 20 | <i>Typha elephantica</i>       | Typhaceae    | Emergent plant                      | Bora. Elephant grass, Indian reed-mace       | Algeria, Egypt, Libya, Mauritania, Senegal, Chad, Eritrea, Ethiopia, Turkmenista                                                                           | - | + | + | - | + | + |

|    |                                                   |               |                            |                                        |                                                                                                                                        |   |   |   |   |   |   |
|----|---------------------------------------------------|---------------|----------------------------|----------------------------------------|----------------------------------------------------------------------------------------------------------------------------------------|---|---|---|---|---|---|
|    |                                                   |               |                            |                                        | n, Tajikistan, Uzbekistan, Palestine, Israel, Saudi Arabia, Yemen, Yunnan, Assam, Bangladesh, India, Bhutan, Nepal, Pakistan and Burma |   |   |   |   |   |   |
| 21 | <i>Ranunculus cantoneinsis</i>                    | Ranunculaceae | Herbaceous plant           | Chinese Buttercup                      | North America                                                                                                                          | + | + | + | + | + | + |
| 22 | <i>Alternanthera philoxeroides</i> (Mart.) Griseb | Amaranthaceae | Herbaceous plant           | Alligator weed                         | Temperate region of South America                                                                                                      | + | + | + | + | + | + |
| 23 | <i>Marsilea quadriflora</i>                       | Marsileaceae  | Herbaceous plant           | Water clover                           | Caucasia, Western Siberia, Afghanistan, Southwest India, China, Japan and North America                                                | + | + | + | + | + | + |
| 24 | <i>Polygonum glabrum</i>                          | Polygonaceae  | Perennial amphibious shrub | Marsh Buckwheat, Dense flower Knotweed | North America and Eurasia                                                                                                              | - | + | + | - | + | + |
| 25 | <i>Bulbostylis barbata</i>                        | Cyperaceae    | Sedges                     | Watergrass                             | Western Australia                                                                                                                      | - | + | + | - | + | + |
| 26 | <i>Cyperus rotundus</i> L.                        | Cyperaceae    | Sedges                     | Nut sedge                              | Africa, southern and central Europe                                                                                                    | + | + | + | + | + | + |

|    |                            |              |                       |                                                                                                                                                                                                         |                                                     |   |   |   |   |   |   |
|----|----------------------------|--------------|-----------------------|---------------------------------------------------------------------------------------------------------------------------------------------------------------------------------------------------------|-----------------------------------------------------|---|---|---|---|---|---|
|    |                            |              |                       |                                                                                                                                                                                                         | (north to France and Austria), and Southern Asia    |   |   |   |   |   |   |
| 27 | <i>Scirpus velidus</i>     | Cyperaceae   | Perennial sedges      | River Club-Rush                                                                                                                                                                                         | North America                                       | + | + | + | + | + | + |
| 28 | <i>Cyperus dives</i>       | Cyperaceae   | Perennial sedges      | Papyrus sedges, flat sedges, nutsedges, umbrella-sedges and galingales                                                                                                                                  | Syria to Africa, Pakistan to Vietnam                | + | + | + | + | + | + |
| 29 | <i>Panicum repens</i>      | Poaceae      | Littoral zone grasses | Torpedo grass, creeping panic, panic rampant, couch panicum, wainaku grass, quack grass, dog-tooth grass, and bullet grass                                                                              | Africa and Eurasia                                  | + | + | + | + | + | + |
| 30 | <i>Euphorbia hirta</i>     | Euphorbeacea | Littoral zone weed    | Dove Milk. Garden Spurge                                                                                                                                                                                | Native to tropical and subtropical America          | + | + | + | + | + | + |
| 31 | <i>Dicanthum annulatum</i> | Poaceae      | Littoral zone grasses | Marvel grass, Diaz bluestem, Kleberg bluestem, Hindi grass, ringed dichanthium, she da grass, medio bluestem, jargu grass, Delhi grass, vuda bluegrass, two-flowered golden-beard, Santa Barbara grass. | Tropical Asia, the Middle East, and parts of Africa | + | + | + | + | + | + |

|    |                                 |                      |                         |                                                           |                                                           |   |   |   |   |   |   |
|----|---------------------------------|----------------------|-------------------------|-----------------------------------------------------------|-----------------------------------------------------------|---|---|---|---|---|---|
| 32 | <i>Dactyloctenium aegyptium</i> | Poaceae              | Littoral grasses        | Crowfoot grass                                            | Africa                                                    | + | + | + | + | + | + |
| 33 | <i>Ludwigia repens</i>          | Onagraceae           | Aquatic perennial herb  | creeping primrose-willow                                  | North and Central America                                 | + | + | + | - | - | + |
| 34 | <i>Cannabis sativa L.</i>       | <i>Cannabaceae</i>   | Littoral grasses        | hemp, grass, hashish, Mary Jane, pot, marijuana           | Eastern Europe, India, and Iran                           | - | + | - | - | + | - |
| 35 | <i>Chenopodium album</i>        | <u>Amaranthaceae</u> | Littoral grasses        | common lamb squatters, white goosefoot, meal weed, fat he | Europe and Asia                                           | - | + | + | - | - | - |
| 36 | <i>Parthenium hysterophorus</i> | Asteraceae.          | Invasive Shoreline weed | carrot grass, congress grass or Gajar ghas                | American tropics                                          | - | + | + | + | + | + |
| 37 | <i>Cyperus eragrostis</i>       | Cyperaceae           | Sedges                  | tall flat sedge                                           | South America and parts of Western USA (Tropical America) | - | + | + | - | - | - |
